# Supplementary material
Source: PubMed Central journal article supplement (PMC397409)
Supplement: pnas_101_15_5482__1.pdf [file pnas_101_15_5482__1.pdf]

## SUPPORTING TEXT

**General Information.** Commercial reagents were purified prior to use following the guidelines of Perrin and Armarego (1). Organic solutions were concentrated under reduced pressure on a Büchi rotary evaporator. Methylene chloride was distilled from calcium hydride prior to use. Chromatographic purification of products was accomplished using forced-flow chromatography on ICN 60 32-64 mesh silica gel 63 according to the method of Still *et al.* (2). TLC was performed on EM Reagents 0.25-mm Silica Gel 60-F plates. Visualization of the developed chromatogram was performed by fluorescence quenching or anisaldehyde stain.

$^1\text{H}$  and  $^{13}\text{C}$  NMR spectra were recorded on Varian Mercury 300 (300 MHz and 75 MHz, respectively) at room temperature or an elevated temperature, as noted, and are internally referenced to residual protio solvent signals. Data for  $^1\text{H}$  are reported as follows: chemical shift ( $\delta$  ppm), multiplicity (s = singlet, d = doublet, t = triplet, q = quartet, m = multiplet), integration, coupling constant (Hz), and assignment. Data for  $^{13}\text{C}$  NMR are reported in terms of chemical shift. IR spectra were recorded on a Perkin-Elmer Paragon 1000 spectrometer and are reported in terms of frequency of absorption ( $\text{cm}^{-1}$ ). Mass spectra were obtained from the UC Irvine Mass Spectral facility. HPLC was performed on Hewlett-Packard 1100 Series chromatographs using Chiralcel AD column (1.6 x 25 cm) and AD guard (1.6 x 5 cm), Chiralcel OD-H (1.6 x 25 cm) and OD guard (1.6 x 5 cm), or Chiralcel AS (1.6 x 25 cm) and AS guard (1.6 x 5 cm), as noted.

**General Procedure.** An amber 2-dram vial equipped with a magnetic stir bar, containing (2*S*, 5*S*)-5-benzyl-2-*tert*-butyl-3-methyl-imidazolidin-4-one (catalyst **1**) or (2*S*, 5*S*)-2-*tert*-butyl-5-(1*H*-indol-3-ylmethyl)3-methyl-imidazolidin-4-one (catalyst **8a**) acid salt and tryptamine or tryptophol substrate was charged with methylene chloride and water, then placed in a bath of the appropriate temperature. The solution was stirred for 5 min before addition of the  $\alpha,\beta$ -unsaturated aldehyde. The resulting suspension was stirred at constant temperature until complete consumption of the indole was observed as determined by TLC. To the reaction mixture was then added pH 7.0 buffer and extracted with diethyl ether and concentrated *in vacuo*. The resulting residue was purified by silica gel chromatography (solvents noted) to afford the title compounds. The enantioselectivity was determined by subjecting approximately 10 mg of the title compound to an excess of sodium borohydride and 1 ml of absolute ethanol. After 15 min, the remaining sodium borohydride was quenched with saturated aqueous  $\text{NaHCO}_3$ , and the

mixture was extracted with CH<sub>2</sub>Cl<sub>2</sub>. The organic layer was separated, filtered through a silica gel plug, and subjected to HPLC analysis.

**(2*R*,3*R*)-8-Allyl-3a-(3-oxo-propyl)-3,3a,8,8a-tetrahydro-2*H*-pyrrolo[2,3-*b*]indole-1-carboxylic acid *tert*-butyl ester (Table 2, entry 1).** Prepared according to the general procedure from acrolein (153  $\mu$ l, 2.43 mmol), *N*-10-BOC-1-allyltryptamine (166 mg, 0.608 mmol), and (2*R*, 5*R*)-catalyst **8a** TFA salt (48 mg, 0.122 mmol) in CH<sub>2</sub>Cl<sub>2</sub> (1.63 ml) and water (0.290 ml) at  $-80^{\circ}\text{C}$  for 25 h to provide the title compound as a colorless oil (178 mg, 89% yield, 89% ee) after silica gel chromatography in 25% EtOAc/hexanes. IR (film) 2971, 2932, 2873, 2727, 1725, 1695, 1606, 1491, 1394, 1366, 1220, 1158, 1105, 1080, 936, 888, 743  $\text{cm}^{-1}$ ; <sup>1</sup>H NMR (300 MHz, VT =  $90^{\circ}\text{C}$ , C<sub>7</sub>D<sub>8</sub>)  $\delta$  9.18 (s, 1H, CHO), 6.96 (d,  $J = 2.8$  Hz, 1H, 4-ArH), 6.68 (d,  $J = 7.1$  Hz, 1H, 6-ArH), 6.67 (t,  $J = 7.0$  Hz, 1H, 5-ArH), 6.29 (d,  $J = 7.7$  Hz, 1H, 7-ArH), 5.79 (ddd,  $J = 5, 11, 17$  Hz, 1H, CH<sub>2</sub>CHCH<sub>2</sub>), 5.27 (s, 1H, NCHN), 5.16 (dd,  $J = 1.1, 17$  Hz, 1H, CH<sub>2</sub>CHCH<sub>2</sub>), 5.00 (d,  $J = 1.1, 10$  Hz, 1H CH<sub>2</sub>CHCH<sub>2</sub>), 4.00 (d,  $J = 5$  Hz, 2H, NCH<sub>2</sub>CH), 3.65 (t,  $J = 8.8$  Hz, 1H, CH<sub>2</sub>CHHN); 2.83 (dt,  $J = 6.0, 15.4$  Hz, 1H, CH<sub>2</sub>CHHN); 2.08 (app q,  $J = 2.2$  Hz, 1H, CH<sub>2</sub>CHHCHO), 1.93-1.46 (m, 5H, CH<sub>2</sub>CH<sub>2</sub>N, CH<sub>2</sub>CHHCHO), 1.49 (s, 9H, C(CH<sub>3</sub>)<sub>3</sub>); <sup>13</sup>C NMR (75 MHz, CDCl<sub>3</sub>)  $\delta$  201.6, 155.0 [153.9], 150.5, 134.5, 130.9, 128.9, 122.9, [117.7] 117.4, 116.0, 106.2, [84.6] 84.1, [80.7] 80.0, [56.9] 55.5, 48.6, 45.6 [45.0], 40.4, 39.0 [38.5], [31.7] 31.3, 28.7; HRMS (CI) exact mass calcd for (C<sub>21</sub>H<sub>28</sub>N<sub>2</sub>O<sub>3</sub>) requires  $m/z$  356.2100, found  $m/z$  356.2112.  $[\alpha]_{\text{D}} = 449.1$  ( $c = 1.0$ , CHCl<sub>3</sub>). The enantiomeric ratio was determined by HPLC analysis of the alcohol, obtained by NaBH<sub>4</sub> reduction of the aldehyde, using a Chiracel OD-H and OD guard column (4% ethanol/hexanes, 1 ml/min); *R* isomer  $t_{\text{r}} = 10.7$  min and *S* isomer  $t_{\text{r}} = 12.3$  min. The minor counterparts of doubled signals due to Boc rotamers are shown in [ ].

**(2*R*,3*R*)-8-Allyl-3a-(3-oxo-propyl)-3,3a,8,8a-tetrahydro-2*H*-pyrrolo[2,3-*b*]indole-1-carboxylic acid ethyl ester (Table 2, entry 2).** Prepared according to the general procedure from acrolein (153  $\mu$ l, 2.43 mmol), *N*-10-ethylcarbamate-1-allyltryptamine (166 mg, 0.608 mmol), and (2*R*, 5*R*)-catalyst **8a** TFA salt (48 mg, 0.122 mmol) in CH<sub>2</sub>Cl<sub>2</sub> (1.63 ml) and water (0.290 ml) at  $-80^{\circ}\text{C}$  for 26 h to provide the title compound as a colorless oil (178 mg, 89% yield, 89% ee) after silica gel chromatography in 15-25% EtOAc/hexanes. IR (film) 3053, 2979, 2933, 2723, 1698, 1606, 1491, 1464, 1417, 1381, 1343, 1311, 1212, 1165, 1106, 1082, 1031, 936, 891,

744  $\text{cm}^{-1}$ ;  $^1\text{H}$  NMR (300 MHz, VT = 80°C,  $\text{C}_7\text{D}_8$ )  $\delta$  9.17 (s, 1H, CHO), 7.01 (d,  $J$  = 1.2 Hz, 1H, 4-ArH), 6.68 (d,  $J$  = 7.61 Hz, 1H, 6-ArH), 6.60 (t,  $J$  = 7.3 Hz, 1H, 5-ArH), 6.31 (d,  $J$  = 7.9 Hz, 1H, 7-ArH), 5.79 (ddd,  $J$  = 5.5, 10.7, 22.3 Hz, 1H,  $\text{CH}_2\text{CHCH}_2$ ), 5.29 (s, 1H, NCHN), 5.18 (d,  $J$  = 17 Hz, 1H,  $\text{CH}_2\text{CHCH}_2$ ), 5.02 (d,  $J$  = 1.2, 10 Hz, 1H  $\text{CH}_2\text{CHCH}_2$ ), 4.04 (m, 4H,  $\text{NCH}_2\text{CH}$ ,  $\text{CH}_3\text{CH}_2\text{O}$ ), 3.67 (t,  $J$  = 8.2 Hz, 1H,  $\text{CH}_2\text{CHHN}$ ); 2.86 (dt,  $J$  = 5.8, 16.8 Hz, 1H,  $\text{CH}_2\text{CHHN}$ ); 2.10 (app. q,  $J$  = 2.4 Hz, 1H,  $\text{CH}_2\text{CHHCHO}$ ), 1.97-1.46 (m, 5H,  $\text{CH}_2\text{CH}_2\text{N}$ ,  $\text{CH}_2\text{CHHCHO}$ ), 1.09 (t,  $J$  = 7.0 Hz, 3H,  $\text{CH}_2\text{CH}_3$ );  $^{13}\text{C}$  NMR (75 MHz,  $\text{C}_7\text{D}_8$ )  $\delta$  199.0, 157.4, 150.4, 134.8, 131.0, 128.8, 122.6, 117.7, 115.9, 106.5, 84.5, 61.1, 48.6, 45.3, 40.1, 38.7, 38.1, 31.2, 14.9; HRMS (CI) exact mass calcd for ( $\text{C}_{19}\text{H}_{24}\text{N}_2\text{O}_3$ ) requires  $m/z$  328.1787, found  $m/z$  328.1792.  $[\alpha]_{\text{D}} = 308.2$  ( $c$  = 1.0,  $\text{CHCl}_3$ ). The enantiomeric ratio was determined by HPLC analysis of the alcohol, obtained by  $\text{NaBH}_4$  reduction of the aldehyde, using a Chiracel AD and AD guard column (6% ethanol/hexanes, 1 ml/min);  $R$  isomer  $t_{\text{r}}$  = 11.5 min and  $S$  isomer  $t_{\text{r}}$  = 13.6 min.

**(2*R*,3*R*)-8-Prenyl-3*a*-(3-oxo-propyl)-3,3*a*,8,8*a*-tetrahydro-2*H*-pyrrolo[2,3-*b*]indole-1-**

**carboxylic acid ethyl ester (Table 2, entry 3).** Prepared according to the general procedure from acrolein (131  $\mu\text{l}$ , 2.08 mmol),  $N$ -10-ethylcarbamate-1-prenyltryptamine (171 mg, 0.521 mmol), and (2*R*, 5*R*)-catalyst **8a** TFA salt (41 mg, 0.104 mmol) in  $\text{CH}_2\text{Cl}_2$  (1.43 ml) and water (0.253 ml) at  $-80^\circ\text{C}$  for 24 h to provide the title compound as a colorless oil (179 mg, 89% yield, 89% ee) after silica gel chromatography in 15% EtOAc/hexanes. IR (film) 2959, 2927, 2703, 1716, 1695, 1604, 1487, 1444, 1412, 1380, 1348, 1311, 1209, 1161, 1108, 1081, 1017, 932, 895, 772, 745  $\text{cm}^{-1}$ ;  $^1\text{H}$  NMR (300 MHz, VT = 90°C,  $\text{C}_7\text{D}_8$ )  $\delta$  9.29 (t,  $J$  = 1.6 Hz, 1H, CHO), 7.09 (d,  $J$  = 1.6 Hz, 1H, 4-ArH), 6.78 (dd,  $J$  = 1.6, 7.7 Hz, 1H, 6-ArH), 6.70 (t,  $J$  = 8.2 Hz, 1H, 5-ArH), 6.43 (d,  $J$  = 8.2 Hz, 1H, 7-ArH), 5.39 (m, 2H,  $\text{CH}_2\text{CHC}(\text{CH}_3)_2$ , NCHN), 4.29 (dd,  $J$  = 6.0, 15.9 Hz, 1H,  $\text{CH}_3\text{CHHO}$ ), 4.16 (dd,  $J$  = 7.1, 14.3 Hz, 2H,  $\text{NCH}_2\text{CH}$ ), 4.05 (dd,  $J$  = 5.5, 16.5 Hz, 1H,  $\text{CH}_3\text{CHHO}$ ), 3.76 (t,  $J$  = 8.7 Hz, 1H,  $\text{CH}_2\text{CHHN}$ ); 2.95 (dt,  $J$  = 6.0, 14.8 Hz, 1H,  $\text{CH}_2\text{CHHN}$ ); 2.17 (app q,  $J$  = 2.2 Hz, 1H,  $\text{CH}_2\text{CHHCHO}$ ), 2.09-1.56 (m, 5H,  $\text{CH}_2\text{CH}_2\text{N}$ ,  $\text{CH}_2\text{CHHCHO}$ ), 1.77 (s, 3H,  $\text{C}(\text{CH}_3)_2$ ), 1.70 (s, 3H,  $\text{C}(\text{CH}_3)_2$ ), 1.18 (t,  $J$  = 7.1 Hz, 3H,  $\text{CH}_2\text{CH}_3$ );  $^{13}\text{C}$  NMR (75 MHz,  $\text{C}_7\text{D}_8$ )  $\delta$  198.5, 158.4, 150.9, 133.6, 131.5, 128.8, 122.6, 122.1, 117.6, 106.6, 84.8, 60.9, 45.4, 44.2, 43.4, 40.1, 38.5, 31.4, 25.4, 17.9, 14.7; HRMS (CI) exact mass calcd for ( $\text{C}_{21}\text{H}_{28}\text{N}_2\text{O}_3$ ) requires  $m/z$  356.2100, found  $m/z$  356.2093.  $[\alpha]_{\text{D}} = 265.7$  ( $c$  = 1.0,  $\text{CHCl}_3$ ). The enantiomeric ratio was determined by HPLC analysis of the alcohol, obtained by  $\text{NaBH}_4$

reduction of the aldehyde, using a Chiracel AD and AD guard column (2% ethanol/hexanes, 1 ml/min); *R* isomer  $t_r = 38.1$  min and *S* isomer  $t_r = 42.6$  min.

**(2*R*,3*R*)-8-Benzyl-3a-(3-oxo-propyl)-3,3a,8,8a-tetrahydro-2*H*-pyrrolo[2,3-*b*]indole-1-carboxylic acid allyl ester (Table 2, entry 4).** Prepared according to the general procedure from acrolein (133  $\mu$ l, 2.13 mmol), *N*-10-allylcarbamate-1-benzyltryptamine (170 mg, 0.532 mmol), and (2*R*, 5*R*)-catalyst **8a** TFA salt (42 mg, 0.106 mmol) in  $\text{CH}_2\text{Cl}_2$  (1.43 ml) and water (0.253 ml) at  $-80^\circ\text{C}$  for 24 h to provide the title compound as a colorless oil (166 mg, 83% yield, 89% ee) after silica gel chromatography in 15% EtOAc/hexanes. IR (film) 3063, 3033, 2946, 2887, 2711, 1701, 1603, 1491, 1452, 1408, 1364, 1354, 1330, 1213, 1159, 1105, 1083, 1032, 978, 939, 882, 743, 700  $\text{cm}^{-1}$ ;  $^1\text{H}$  NMR (300 MHz, VT =  $90^\circ\text{C}$ ,  $\text{C}_7\text{D}_8$ )  $\delta$  9.20 (s, 1H, CHO), 7.35 (d,  $J = 7.1$  Hz, 1H, BnH), 7.22-6.99 (m, 5H, BnH, 4-ArH), 6.76 (d,  $J = 7.2$  Hz, 1H, 6-ArH), 6.67 (t,  $J = 7.1$  Hz, 1H, 5-ArH), 6.33 (d,  $J = 8.2$  Hz, 1H, 7-ArH), 5.82 (ddd,  $J = 6.0, 11.0, 22.0$  Hz, 1H,  $\text{CH}_2\text{CHCH}_2$ ), 5.42 (s, 1H, NCHN), 5.16 (d,  $J = 17$  Hz, 1H,  $\text{CH}_2\text{CHCH}_2$ ), 5.04 (d,  $J = 10.4$  Hz, 1H,  $\text{CH}_2\text{CHCH}_2$ ), 4.74-4.50 (m, 4H,  $\text{CH}_2\text{CH}_2\text{O}$ ,  $\text{NCH}_2\text{Ar}$ ), 3.78 (t,  $J = 8.7$  Hz, 1H,  $\text{CH}_2\text{CHHN}$ ); 3.00 (dt,  $J = 6.0, 17.0$  Hz, 1H,  $\text{CH}_2\text{CHHN}$ ); 2.21-2.16 (m, 2H,  $\text{CH}_2\text{CH}_2\text{CHO}$ ), 1.86-1.77 (m, 2H,  $\text{CH}_2\text{CH}_2\text{N}$ ), 1.66-1.57 (m, 2H,  $\text{CH}_2\text{CH}_2\text{CHO}$ );  $^{13}\text{C}$  NMR (75 MHz,  $\text{C}_7\text{D}_8$ )  $\delta$  201, 155.5 [154.4], 150.7, 139.2, 133.1 [132.9], 129.3, [128.8] 128.6, 127.6, 127.2 [126.8], 123.1, [118.8] 118.2, 117.9 [117.7], 106.6, 84.3, [66.6] 66.2, [57.0] 55.6, 45.4, 40.2, 39.2 [38.5], [31.7] 31.4; HRMS (CI) exact mass calcd for ( $\text{C}_{24}\text{H}_{26}\text{N}_2\text{O}_3$ ) requires  $m/z$  390.1943, found  $m/z$  390.1945.  $[\alpha]_D = 247.8$  ( $c = 1.0$ ,  $\text{CHCl}_3$ ). The enantiomeric ratio was determined by HPLC analysis of the alcohol, obtained by  $\text{NaBH}_4$  reduction of the aldehyde, using a Chiracel AD and AD guard column (6% isopropyl alcohol/hexanes, 1 ml/min); *R* isomer  $t_r = 31.0$  min and *S* isomer  $t_r = 39.7$  min. The minor counterparts of doubled signals due to Boc rotamers are shown in [ ].

**(2*S*,3*S*)-8-Benzyl-3a-(3-oxo-propyl)-3,3a,8,8a-tetrahydro-2*H*-pyrrolo[2,3-*b*]indole-1-carboxylic acid *tert*-butyl ester (Table 2, entry 5).** Prepared according to the general procedure from acrolein (0.54 ml, 8.0 mmol), *N*-10-BOC-1-benzyltryptamine (700 mg, 2.0 mmol), and (2*S*, 5*S*)-catalyst **8a** TFA (114 mg, 0.40 mmol), and trifluoroacetic acid (31  $\mu$ l, 0.40 mmol) in  $\text{CH}_2\text{Cl}_2$  (5.0 ml) and  $\text{H}_2\text{O}$  (1.0 ml) at  $-80^\circ\text{C}$  was added acrolein. After stirring for 24 h

at this temperature, the reaction mixture was purified by column chromatography (silica, 10% EtOAc in hexanes) to provide the title compound (670 mg, 82%) as a colorless, viscous oil; 90% ee; IR (thin film) 2974, 2930, 2719, 1123, 1692, 1604, 1493, 1393, 1365, 1158  $\text{cm}^{-1}$ ;  $^1\text{H}$  NMR (300 MHz,  $\text{CDCl}_3$ )  $\delta$  9.60 (d,  $J = 22.5$  Hz, 1H), 7.18-7.34 (m, 5H), 6.95-7.06 (m, 2H), 6.67 (approx d,  $J = 6.6$  Hz, 1H), 6.25 (br dd,  $J = 7.2, 31.5$  Hz, 1H), 5.40 (d,  $J = 47.4$  Hz, 1H), 4.65 (approx s, 2H), 3.86 (br td,  $J = 9.9, 61.8$  Hz, 1H), 3.08 (td,  $J = 6.0, 11.4$  Hz, 1H), 1.90-2.40 (m, 6H), 1.32 (d,  $J = 29.7$  Hz, 9H);  $^{13}\text{C}$  NMR (75 MHz,  $\text{CDCl}_3$ )  $\delta$  201.5, 154.8, 153.8, 150.8, 130.9, 128.9, 128.8, 128.5, 127.3, 126.9, 126.3, 123.0, 118.0, 117.6, 106.4, 85.3, 84.2, 80.8, 80.1, 57.2, 55.6, 50.8, 50.3, 45.7, 45.2, 40.5, 39.3, 38.4, 32.0, 31.6, 28.7, 28.5; HRMS (CI) exact mass calcd for ( $\text{C}_{25}\text{H}_{30}\text{N}_2\text{O}_3$   $^+$ ) requires  $m/z$  406.2256, found  $m/z$ ;  $[\alpha]_{\text{D}}^{25} = -270.1$  ( $c = 1.0$ ,  $\text{CHCl}_3$ ). The enantiomeric purity was determined by HPLC analysis of the alcohol, obtained by  $\text{NaBH}_4$  reduction of the aldehyde, using a by HPLC with a Chiralcel ODH column and ODH guard column (4% EtOH/hexanes, 1 ml/min flow); *R* isomer  $t_{\text{r}} = 10.5$  min and *S* isomer  $t_{\text{r}} = 12.0$  min.

**(2*S*,3*R*,3*aR*)-8-Allyl-3*a*-(1-benzoyl-3-oxo-propyl)-3,3*a*,8,8*a*-tetrahydro-2*H*-pyrrolo[2,3-*b*]indole-1-carboxylic acid *tert*-butyl ester (Table 3, entry 1).** Prepared according to the general procedure from methyl 4-oxo-4-phenyl-but-2-enal (131 mg, 0.816 mmol), *N*-10-BOC-1-allyltryptamine (61 mg, 0.204 mmol), and (2*S*, 5*S*)-catalyst **1** TFA salt (14.7 mg, 0.0408 mmol) in  $\text{CH}_2\text{Cl}_2$  (410  $\mu\text{l}$ ) at  $-40^\circ\text{C}$  for 64 h to provide the title compound as a yellow oil (91.9 mg, 92% yield, 94% ee, 12.7:1 dr) after silica gel chromatography in 25% EtOAc/hexanes. IR (film) 3053, 2968, 2882, 2825, 1717, 1693, 1602, 1493, 1445, 1388, 1369, 1221, 1150, 1097, 973, 935, 883, 773, 745, 692  $\text{cm}^{-1}$ ;  $^1\text{H}$  NMR (300 MHz, VT =  $90^\circ\text{C}$ ,  $\text{C}_7\text{D}_8$ )  $\delta$  8.94 (s, 1H, CHO), 7.95 (d,  $J = 8.2$  Hz, 2H, COAr *o*-H), 7.13-6.94 (m, 4H, 4-ArH, COAr *m*-H, COAr *p*-H), 6.77 (d,  $J = 7.7$  Hz, 1H, 6-ArH), 6.54 (t,  $J = 7.1$  Hz, 1H, 5-ArH), 6.31 (d,  $J = 7.7$  Hz, 1H, 7-ArH), 5.96 (s, 1H, NCHN), 5.85 (ddd,  $J = 4.5, 10.4, 22.5$  Hz, 1H,  $\text{CH}_2\text{CHCH}_2$ ), 5.19 (d,  $J = 17$  Hz, 1H,  $\text{CH}_2\text{CHCH}_2$ ), 5.02 (d,  $J = 10.4$  Hz, 1H  $\text{CH}_2\text{CHCH}_2$ ), 4.36 (dd,  $J = 2.7, 9.9$  Hz, 2H, NCH<sub>2</sub>CH), 3.98 (m, 1H,  $\text{CH}_2\text{CHHN}$ ), 3.59 (m, 1H, CHCOPh), 2.86 (dd,  $J = 9.9, 18.7$  Hz, 1H,  $\text{CH}_2\text{CHHN}$ ), 2.67 (m, 1H, CHCHHCHO), 2.12 (m, 1H,  $\text{CH}_2\text{CHHCHO}$ ), 1.76 (m, 2H,  $\text{CH}_2\text{CH}_2\text{N}$ ), 1.45 (s, 9H,  $\text{C}(\text{CH}_3)_3$ );  $^{13}\text{C}$  NMR (75 MHz,  $\text{CDCl}_3$ )  $\delta$  200.6, 197.6, 150.5, 135.0, 132.5, 130.6, 129.1, 128.9, 128.3, 128.1, 125.3, 124.6, 123.0, 117.5, 115.5, 106.4, 81.9, 79.4, 48.4, 45.0, 44.9, 44.5, 36.5, 28.4, HRMS (CI) exact mass calcd for ( $\text{C}_{28}\text{H}_{33}\text{N}_2\text{O}_4$ ) requires  $m/z$  461.5738, found  $m/z$

461.2440  $[\alpha]_D = -247.1$  ( $c = 1.0$ ,  $\text{CHCl}_3$ ). The enantiomeric ratio was determined by HPLC analysis of the alcohol, obtained by  $\text{NaBH}_4$  reduction of the aldehyde, using a Chiracel OD-H and OD guard column (5% ethanol/hexanes, 1 ml/min); *Major* isomer  $t_r = 18.9$  min and *Minor* isomer  $t_r = 26.3$  min. The diastereomeric ratio was determined by HPLC analysis of the alcohol, obtained by  $\text{NaBH}_4$  reduction of the aldehyde, using a Chiracel Sil-Rx and (4% ethanol/hexanes, 1 ml/min); *Major* isomer  $t_r = 10.4$  min and *Minor* isomer  $t_r = 11.3$  min.

**(2*S*,3*R*,3*aR*)-8-Allyl-3*a*-(1-benzoyloxymethyl-3-oxo-propyl)-3,3*a*,8,8*a*-tetrahydro-2*H*-pyrrolo[2,3-*b*]indole-1-carboxylic acid *tert*-butyl ester (Table 3, entry 2).** Prepared according to the general procedure from 4-benzyloxy-but-2-enal (155 mg, 0.816 mmol), *N*-10-BOC-1-allyltryptamine (61 mg, 0.204 mmol), and (2*S*, 5*S*)-catalyst **1** TFA salt (14.7 mg, 0.0408 mmol) in  $\text{CH}_2\text{Cl}_2$  (410  $\mu\text{l}$ ) at  $-40^\circ\text{C}$  for 44 h to provide the title compound as a colorless oil (65.5 mg, 66% yield, 91% ee, 22.4:1 dr) after silica gel chromatography in 20% EtOAc/hexanes. IR (film) 2980, 2872, 1734, 1724, 1689, 1606, 1493, 1389 1365, 1316, 1272, 1218, 1154, 1105, 1065, 1026, 942, 888, 770, 716  $\text{cm}^{-1}$ ;  $^1\text{H}$  NMR (300 MHz, VT =  $90^\circ\text{C}$ ,  $\text{C}_7\text{D}_8$ )  $\delta$  9.37 (s, 1H, CHO), 8.02 (d,  $J = 6.6$  Hz, 2H, COAr *o*-H), 7.24-7.03 (m, 4H, 4-ArH, COAr *m*-H, COAr *p*-H), 6.82 (d,  $J = 7.1$  Hz, 1H, 6-ArH), 6.66 (t,  $J = 7.1$  Hz, 1H, 5-ArH), 6.38 (d,  $J = 8.2$  Hz, 1H, 7-ArH), 5.94-5.85 (m, 1H,  $\text{CH}_2\text{CHCH}_2$ ), 5.73 (s, 1H, NCHN), 5.27 (d,  $J = 17$  Hz, 1H,  $\text{CH}_2\text{CHCH}_2$ ), 5.11 (d,  $J = 10.4$  Hz, 1H  $\text{CH}_2\text{CHCH}_2$ ), 4.52 (dd,  $J = 4.4, 11.5$  Hz, 2H,  $\text{NCH}_2\text{CH}$ ), 4.11 (m, 1H,  $\text{CHCHHO}$ ), 3.96 (dd,  $J = 6.5, 11.5$  Hz, 1H,  $\text{CHCHHO}$ ), 3.78 (m, 1H,  $\text{CH}_2\text{CHHN}$ ), 2.90-2.80 (m, 1H,  $\text{CHCHHCHO}$ ), 2.67-2.59 (m, 1H,  $\text{CHCHHCHO}$ ), 2.41-2.16 (m, 3H,  $\text{CH}_2\text{CHHN}$ ,  $\text{CHHCH}_2\text{N}$ ,  $\text{CHCH}_2\text{O}$ ), 1.81-1.71 (m, 1H,  $\text{CHHCH}_2\text{N}$ ), 1.50 (s, 9H,  $\text{C}(\text{CH}_3)_3$ );  $^{13}\text{C}$  NMR (75 MHz,  $\text{CDCl}_3$ )  $\delta$  200.5, 193.5, 166.5, 150.8, 142.8, 134.5, 133.4, 129.4, 128.7, 125.7, 123.6, 119.3, 117.5, 116.1, 109.8, 106.7, 88.7, 65.7, 59.5, 48.6, 45.6, 43.9, 40.3, 37.2, 28.7. HRMS (CI) exact mass calcd for ( $\text{C}_{29}\text{H}_{35}\text{N}_2\text{O}_5$ ) requires  $m/z$  491.5998, found  $m/z$  491.2546  $[\alpha]_D = -148$  ( $c = 1.0$ ,  $\text{CHCl}_3$ ). The enantiomeric ratio was determined by HPLC analysis of the alcohol, obtained by  $\text{NaBH}_4$  reduction of the aldehyde, using a Chiracel AD and AD guard column (5% ethanol/hexanes, 1 ml/min); *Major* isomer  $t_r = 11.7$  min and *Minor* isomer  $t_r = 14.8$  min. The diastereomeric ratio was determined by HPLC analysis of the alcohol, obtained by  $\text{NaBH}_4$  reduction of the aldehyde, using a Chiracel Sil and (5% ethanol/hexanes, 1 ml/min); *Minor* isomer  $t_r = 12.1$  min and *Major* isomer  $t_r = 13.7$  min.

**(2*S*,3*R*,3*aR*)-8-Allyl-3*a*-(1-methoxycarbonyl-3-oxo-propyl)-3,3*a*,8,8*a*-tetrahydro-2*H*-pyrrolo[2,3-*b*]indole-1-carboxylic acid *tert*-butyl ester (Table 3, entry 3).** Prepared according to the general procedure from methyl 4-oxo-butenate (165 mg, 1.45 mmol), *N*-10-BOC-1-allyltryptamine (109 mg, 0.362 mmol), and (2*S*, 5*S*)-catalyst **1** TFA salt (26.1 mg, 0.0724 mmol) in CH<sub>2</sub>Cl<sub>2</sub> (700  $\mu$ l) at  $-60^{\circ}\text{C}$  for 29 h to provide the title compound as a colorless oil (140 mg, 93% yield, 91% ee, 44:1 dr) after silica gel chromatography in 10-20% EtOAc/hexanes. IR (film) 2973, 2904, 2736, 1730, 1696, 1607, 1493, 1389, 1365, 1217, 1152, 1098, 935, 890, 742  $\text{cm}^{-1}$ ; <sup>1</sup>H NMR (300 MHz, VT =  $90^{\circ}\text{C}$ , C<sub>7</sub>D<sub>8</sub>)  $\delta$  9.15 (s, 1H, CHO), 7.06 (obs, 1H, 4-ArH), 6.71 (d,  $J$  = 7.1 Hz, 1H, 6-ArH), 6.64 (t,  $J$  = 6.6 Hz, 1H, 5-ArH), 6.38 (d,  $J$  = 7.7 Hz, 1H, 7-ArH), 5.96 (s, 1H, NCHN), 5.96-5.80 (m, 1H, CH<sub>2</sub>CHCH<sub>2</sub>), 5.28 (d,  $J$  = 17 Hz, 1H, CH<sub>2</sub>CHCH<sub>2</sub>), 5.11 (d,  $J$  = 9.9 Hz, 1H CH<sub>2</sub>CHCH<sub>2</sub>), 4.08 (s, 2H, NCH<sub>2</sub>CH), 3.80 (m, 1H, CH<sub>2</sub>CHHN), 3.42 (s, 3H, CO<sub>2</sub>CH<sub>3</sub>), 3.28 (d,  $J$  = 11.0 Hz, 1H, CHCO<sub>2</sub>CH<sub>3</sub>), 2.85 (dd,  $J$  = 9.9, 16.5 Hz, 1H, CH<sub>2</sub>CHHN), 2.70 (dd,  $J$  = 11.0, 18.1 Hz, 1H, CH<sub>2</sub>CHHCHO), 2.20 (m, 1H, CHCHHCHO), 2.11 (t,  $J$  = 18.2 Hz, 2H, CH<sub>2</sub>CH<sub>2</sub>N), 1.52 (s, 9H, C(CH<sub>3</sub>)<sub>3</sub>); <sup>13</sup>C NMR (75 MHz, CDCl<sub>3</sub>)  $\delta$  197.1, 172.2, 150.6, 135.0, 130.0, 129.0, 125.4, 122.8, 117.7, 115.6, 106.5, 82.4, 79.5, 59.2, 47.4, 45.9, 44.9, 43.6, 38.3, 37.0, 28.5, HRMS (CI) exact mass calcd for (C<sub>23</sub>H<sub>31</sub>N<sub>2</sub>O<sub>5</sub>) requires  $m/z$  415.2233, found  $m/z$  415.2253 [ $\alpha$ ]<sub>D</sub> =  $-189.9$  ( $c$  = 1.0, CHCl<sub>3</sub>). The enantiomeric ratio was determined by HPLC analysis of the alcohol, obtained by NaBH<sub>4</sub> reduction of the aldehyde, using a Chiracel AD and AD guard column (5% ethanol/hexanes, 1 ml/min); *Major* isomer  $t_r$  = 10.0 min and *Minor* isomer  $t_r$  = 14.8 min. The diastereomeric ratio was determined by HPLC analysis of the alcohol, obtained by NaBH<sub>4</sub> reduction of the aldehyde, using a Chiracel Sil-Rx and (5% ethanol/hexanes, 1 ml/min); *Minor* isomer  $t_r$  = 9.2 min and *Major* isomer  $t_r$  = 10.5 min.

**(2*S*,3*R*,3*aR*)-8-Allyl-3*a*-(1-methoxycarbonyl-3-oxo-propyl)-5-methyl-3,3*a*,8,8*a*-tetrahydro-2*H*-pyrrolo[2,3-*b*]indole-1-carboxylic acid *tert*-butyl ester (Table 3, entry 4).** Prepared according to the general procedure from methyl 4-oxo-butenate (160 mg, 1.4 mmol), *N*-10-BOC-1-allyl-5-methyltryptamine (110 mg, 0.35 mmol), and (2*S*, 5*S*)-catalyst **1** TFA salt (25.2 mg, 0.07 mmol) in CH<sub>2</sub>Cl<sub>2</sub> (700  $\mu$ l) at  $-60^{\circ}\text{C}$  for 18 h to provide the title compound as a colorless oil (141 mg, 94% yield, 92% ee, >50:1 dr) after silica gel chromatography in 10-20% EtOAc/hexanes. IR (film) 2966, 2871, 2729, 1730, 1694, 1616, 1501, 1395, 1363, 1221, 1154,

1095, 949, 917, 893, 800, 772  $\text{cm}^{-1}$ ;  $^1\text{H}$  NMR (300 MHz, VT = 90°C,  $\text{C}_7\text{D}_8$ )  $\delta$  9.15 (s, 1H, CHO), 7.06 (obs, 1H, 4-ArH), 6.62 (s, 1H, 6-ArH), 6.33 (d,  $J = 7.7$  Hz, 1H, 7-ArH), 5.95 (s, 1H, NCHN), 5.99-5.90 (m, 1H,  $\text{CH}_2\text{CHCH}_2$ ), 5.29 (d,  $J = 17$  Hz, 1H,  $\text{CH}_2\text{CHCH}_2$ ), 5.13 (d,  $J = 9.9$  Hz, 1H  $\text{CH}_2\text{CHCH}_2$ ), 4.08 (s, 2H,  $\text{NCH}_2\text{CH}$ ), 3.81 (m, 1H,  $\text{CH}_2\text{CHHN}$ ), 3.44 (s, 3H,  $\text{CO}_2\text{CH}_3$ ), 3.30 (dd,  $J = 10.4, 3.3$  Hz, 1H,  $\text{CHCO}_2\text{CH}_3$ ), 2.90 (td,  $J = 6.6, 10.4$  Hz, 1H,  $\text{CH}_2\text{CHHN}$ ), 2.72 (dd,  $J = 10.4, 18.1$  Hz, 1H,  $\text{CHCHHCHO}$ ), 2.21 (s, 3H,  $\text{ArCH}_3$ ), 2.26-2.08 (m, 2H,  $\text{CH}_2\text{CH}_2\text{N}$ ), 1.84 (dd,  $J = 6.0, 12.0$ , 1H,  $\text{CH}_2\text{CHHCHO}$ ), 1.52 (s, 9H,  $\text{C}(\text{CH}_3)_3$ );  $^{13}\text{C}$  NMR (75 MHz,  $\text{CDCl}_3$ )  $\delta$  197.1, 172.2, 148.6, 135.2, 130.4, 129.7, 126.6, 125.4, 123.4, 115.5, 106.5, 82.6, 79.4, 51.2, 48.9, 45.9, 44.9, 43.7, 36.9, 28.5, 20.6 HRMS (CI) exact mass calcd for ( $\text{C}_{24}\text{H}_{32}\text{N}_2\text{O}_5$ ) requires  $m/z$  428.2311, found  $m/z$  428.2327 [ $\alpha$ ] $_D = -164.5$  ( $c = 1.0$ ,  $\text{CHCl}_3$ ). The enantiomeric ratio was determined by HPLC analysis of the alcohol, obtained by  $\text{NaBH}_4$  reduction of the aldehyde, using a Chiracel AS and AS guard column (2% ethanol/hexanes, 1 ml/min); *Major* isomer  $t_r = 10.6$  min and *Minor* isomer  $t_r = 12.8$  min. The diastereomeric ratio was determined by HPLC analysis of the alcohol, obtained by  $\text{NaBH}_4$  reduction of the aldehyde, using a Chiracel AS and AS guard column (7% ethanol/hexanes, 1 ml/min); *Major* isomer  $t_r = 5.8, 6.2$  min and *Minor* isomer  $t_r = 6.9, 7.3$  min.

**(2*S*,3*R*,3*aR*)-8-Allyl-3a-(1-methoxycarbonyl-3-oxo-propyl)-5-methoxy-3,3a,8,8a-tetrahydro-2*H*-pyrrolo[2,3-*b*]indole-1-carboxylic acid *tert*-butyl ester (Table 3, entry 5).** Prepared according to the general procedure from methyl 4-oxo-butenate (102 mg, 0.9 mmol), *N*-10-BOC-1-allyl-5-methoxytryptamine (74 mg, 0.23 mmol), and (2*S*, 5*S*)-catalyst **1** TFA salt (16.0 mg, 0.045 mmol) in  $\text{CH}_2\text{Cl}_2$  (460  $\mu\text{l}$ ) at  $-60^\circ\text{C}$  for 20 h to provide the title compound as a colorless oil (141 mg, 99% yield, 90% ee, 10:1 dr) after silica gel chromatography in 10-20% EtOAc/hexanes. IR (film) 2976, 2927, 2839, 2721, 1730, 1691, 1496, 1437, 1393, 1364, 1222, 1149, 1041, 987, 943, 909, 889, 806, 772  $\text{cm}^{-1}$ ;  $^1\text{H}$  NMR (300 MHz, VT = 90°C,  $\text{C}_7\text{D}_8$ )  $\delta$  9.05 (s, 1H, CHO), 6.55 (dd,  $J = 2.2, 8.2$  Hz, 1H, 4-ArH), 6.45 (d,  $J = 1.6$  Hz, 1H, 6-ArH), 6.22 (d,  $J = 8.8$  Hz, 1H, 7-ArH), 5.82 (s, 1H, NCHN), 5.86 (ddd,  $J = 4.5, 10.4, 22.5$  Hz, 1H,  $\text{CH}_2\text{CHCH}_2$ ), 5.20 (dd,  $J = 1.6, 17.0$  Hz, 1H,  $\text{CH}_2\text{CHCH}_2$ ), 5.02 (dd,  $J = 1.6, 11$  Hz, 1H  $\text{CH}_2\text{CHCH}_2$ ), 3.97 (d,  $J = 4.4$  Hz, 2H,  $\text{NCH}_2\text{CH}$ ), 3.70 (m, 1H,  $\text{CH}_2\text{CHHN}$ ), 3.41 (s, 3H,  $\text{CO}_2\text{CH}_3$ ), 3.30 (s, 3H,  $\text{ArOCH}_3$ ), 3.18 (dd,  $J = 10.4, 3.3$  Hz, 1H,  $\text{CHCO}_2\text{CH}_3$ ), 2.81 (td,  $J = 6.6, 10.4$  Hz, 1H,  $\text{CH}_2\text{CHHN}$ ), 2.62 (dd,  $J = 10.4, 18.1$  Hz, 1H,  $\text{CHCHHCHO}$ ), 2.10-1.90 (m, 2H,  $\text{CH}_2\text{CH}_2\text{N}$ ),



1.72 (dd,  $J = 6.6, 12.6$ , 1H, CH<sub>2</sub>CHHCHO), 1.42 (s, 9H, C(CH<sub>3</sub>)<sub>3</sub>); <sup>13</sup>C NMR (75 MHz, CDCl<sub>3</sub>)  $\delta$  197.0, 171.4, 150.1, 135.4, 128.9, 115.4, 114.2, 110.6, 106.9, 83.0, 79.3, 55.7, 51.0, 49.4, 45.7, 44.9, 43.6, 36.7, 28.4 HRMS (CI) exact mass calcd for (C<sub>24</sub>H<sub>32</sub>N<sub>2</sub>O<sub>6</sub>) requires  $m/z$  444.2260, found  $m/z$  444.2258 [ $\alpha$ ]<sub>D</sub> = -162.5 ( $c = 1.0$ , CHCl<sub>3</sub>). The enantiomeric ratio was determined by HPLC analysis of the alcohol, obtained by NaBH<sub>4</sub> reduction of the aldehyde, using a Chiracel AS and AS guard column (5% ethanol/hexanes, 1 ml/min); *Major* isomer  $t_r = 8.6$  min and *Minor* isomer  $t_r = 10.4$  min. The diastereomeric ratio was determined by HPLC analysis of the alcohol, obtained by NaBH<sub>4</sub> reduction of the aldehyde, using a Chiracel Sil-Rx column (5% ethanol/hexanes, 1 ml/min); *Minor* isomer  $t_r = 20.5$  min and *Major* isomer  $t_r = 22.1$  min.

**(2*S*,3*R*,3*aR*)-6-Bromo-3*a*-(1-methoxycarbonyl-3-oxo-propyl)-8-(3-methyl-but-2-enyl)-3,3*a*,8,8*a*-tetrahydro-2*H*-pyrrolo[2,3-*b*]indole-1-carboxylic acid *tert*-butyl ester (Table 3, entry 6).** Prepared according to the general procedure from methyl 4-oxo-butenoate (597 mg, 5.22 mmol), *N*-10-BOC-1-Prenyl-6-Bromotryptamine (710 mg, 1.74 mmol), and (2*S*, 5*S*)-catalyst **1** (86 mg, 0.35 mmol), and trifluoroacetic acid (27  $\mu$ l, 0.35 mmol) in CH<sub>2</sub>Cl<sub>2</sub> (43.5 ml) at -40°C for 24 h to provide the title compound as a colorless oil (778 mg, 86% yield, 97% ee, 31:1 dr) after silica gel chromatography in 20% EtOAc/hexanes as a colorless, viscous oil. IR (thin film) 2971, 2928, 2716, 1728, 1696, 1600, 1490, 1396, 1364, 1158 cm<sup>-1</sup>; <sup>1</sup>H NMR (300 MHz, CDCl<sub>3</sub>)  $\delta$  9.56 (s, 1H), 6.73 (d,  $J = 7.5$  Hz, 1H), 6.68 (d,  $J = 7.5$  Hz, 1H), 6.37 (s, 1H), 5.71 (br s, 1H), 5.09 (br s, 1H), 3.80-4.09 (m, 3H), 3.62 (s, 3H), 3.21 (dd,  $J = 2.7, 11.1$  Hz, 1H), 2.80-3.01 (m, 2H), 2.33 (br d,  $J = 17.7$  Hz, 1H), 1.91-2.07 (m, 2H), 1.71 (s, 3H), 1.68 (s, 3H), 1.43 (s, 9H); <sup>13</sup>C NMR (75 MHz, CDCl<sub>3</sub>)  $\delta$  199.4, 172.8, 172.5, 154.3, 15.7, 151.6, 134.4, 128.7, 125.6, 124.1, 123.3, 121.3, 120.8, 120.1, 119.8, 109.1, 81.9, 80.9, 80.1, 58.2, 56.9, 52.4, 45.4, 44.7, 43.6, 43.5, 36.6, 36.4, 28.7, 26.0, 18.5; HRMS (CI) exact mass calcd for (C<sub>25</sub>H<sub>33</sub>BrN<sub>2</sub>O<sub>5</sub><sup>+</sup>) requires  $m/z$  520.1573, found  $m/z$  520.1582; [ $\alpha$ ]<sub>D</sub><sup>25</sup> = -196.3 ( $c = 1.0$ , CHCl<sub>3</sub>). The enantiomeric ratio was determined by HPLC analysis of the alcohol, obtained by NaBH<sub>4</sub> reduction of the aldehyde, using a Chiracel OD-H and OD guard column (6% ethanol/hexanes, 1 ml/min); *Major* isomer  $t_r = 8.4$  min and *Minor* isomer  $t_r = 11.1$  min. The diastereomeric ratio was determined by HPLC analysis of the alcohol, obtained by NaBH<sub>4</sub> reduction of the aldehyde, using a Chiracel Sil-Rx column (3% ethanol/hexanes, 1 ml/min); *Minor* isomer  $t_r = 18.1$  min and *Major* isomer  $t_r = 19.5$  min.

**(2*S*,3*R*,3*aR*)-8-Allyl-3*a*-(1-methoxycarbonyl-3-oxo-propyl)-7-methyl-3,3*a*,8,8*a*-tetrahydro-2*H*-pyrrolo[2,3-*b*]indole-1-carboxylic acid *tert*-butyl ester (Table 3, entry 7).** Prepared according to the general procedure from methyl 4-oxo-butenate (160 mg, 1.4 mmol), *N*-10-BOC-1-allyl-7-methyltryptamine (110 mg, 0.35 mmol), and (2*S*, 5*S*)-catalyst **1** TFA salt (25.2 mg, 0.07 mmol) in CH<sub>2</sub>Cl<sub>2</sub> (700 μl) at –60°C for 30 h to provide the title compound as a colorless oil (146 mg, 97% yield, 99% ee, 17:1 dr) after silica gel chromatography in 10-20% EtOAc/hexanes. IR (film) 2976, 2880, 2725, 1738, 1727, 1694, 1601, 1591, 1468, 1402, 1365, 1335, 1250, 1221, 1166, 1136, 937, 911, 881 cm<sup>-1</sup>; <sup>1</sup>H NMR (300 MHz, VT = 90°C, C<sub>7</sub>D<sub>8</sub>) δ 9.21 (d, *J* = 4.4 Hz, 1H, CHO), 7.06 (obs, 1H, 4-ArH), 6.83 (d, *J* = 6.6 Hz, 1H, 6-ArH), 6.33 (obs, 1H, 5-ArH), 5.83 (s, 1H, NCHN), 6.05 - 5.87 (m, 1H, CH<sub>2</sub>CHCH<sub>2</sub>), 5.31 (d, *J* = 17 Hz, 1H, CH<sub>2</sub>CHCH<sub>2</sub>), 5.11 (d, *J* = 10.4 Hz, 1H CH<sub>2</sub>CHCH<sub>2</sub>), 4.28 (s, 2H, NCH<sub>2</sub>CH), 3.77 (m, 1H, CH<sub>2</sub>CHHN), 3.44 (s, 3H, CO<sub>2</sub>CH<sub>3</sub>), 3.33 (dd, *J* = 7.7, 3.3 Hz, 1H, CHCO<sub>2</sub>CH<sub>3</sub>), 2.92 (dd, *J* = 10.4, 17.0 Hz, 1H, CHCHHCHO), 2.72 (dd, *J* = 10.4, 17.6 Hz, 1H, CH<sub>2</sub>CHHN), 2.27 (s, 3H, ArCH<sub>3</sub>), 2.26-2.10 (m, 2H, CH<sub>2</sub>CH<sub>2</sub>N), 1.89 (m, 1H, CH<sub>2</sub>CHHCHO), 1.54 (s, 9H, C(CH<sub>3</sub>)<sub>3</sub>); <sup>13</sup>C NMR (75 MHz, CDCl<sub>3</sub>) δ 197.0, 172.3, 148.7, 136.8, 132.4, 128.9, 128.1, 125.3, 120.7, 119.1, 115.5, 83.6, 79.3, 51.3, 51.1, 45.8, 44.5, 44.2, 37.2, 28.4, 21.0, 19.0 HRMS (CI) exact mass calcd for (C<sub>24</sub>H<sub>32</sub>N<sub>2</sub>O<sub>5</sub>) requires *m/z* 428.2311, found *m/z* 428.2324 [ $\alpha$ ]<sub>D</sub> = –176.7 (*c* = 1.0, CHCl<sub>3</sub>). The enantiomeric ratio was determined by HPLC analysis of the alcohol, obtained by NaBH<sub>4</sub> reduction of the aldehyde, using a Chiracel AD and AD guard column (5% ethanol/hexanes, 1 ml/min); *Major* isomer *t*<sub>r</sub> = 14.0 min and *Minor* isomer *t*<sub>r</sub> = 16.6 min. The diastereomeric ratio was determined by HPLC analysis of the alcohol, obtained by NaBH<sub>4</sub> reduction of the aldehyde, using a Chiracel Sil-Rx column (5% ethanol/hexanes, 1 ml/min); *Major* isomer *t*<sub>r</sub> = 10.0 min and *Minor* isomer *t*<sub>r</sub> = 10.7 min.

**(2*S*,3*R*,3*aR*)-2-(8-Benzyl-2,3,8,8*a*-tetrahydro-furo[2,3-*b*]indole-3*a*-yl)-4-oxo-butyric acid *tert*-butyl ester (Scheme 6).** Prepared according to the general procedure from *t*-butyl 4-oxo-butenate (622 mg, 4 mmol), *N*-Benzyltryptophol (334 mg, 1.33 mmol), and (2*S*, 5*S*)-catalyst **1** TFA salt (96 mg, 0.266 mmol) in CH<sub>2</sub>Cl<sub>2</sub> (4.80 ml) and IPA (500 μl) at –60°C for 40 h to provide the title compound as a colorless oil (325 mg, 80% yield, 93% ee, 12:1 dr) after silica gel chromatography in 15% EtOAc/hexanes. IR (film) 2729, 1721, 1601, 1601, 1407, 1446, 1363,

1254, 1217, 1150, 1026, 948, 772  $\text{cm}^{-1}$ ;  $^1\text{H}$  NMR (300 MHz,  $\text{CDCl}_3$ )  $\delta$  9.57 (s, 1H, CHO), 7.38-7.23 (m, 5H,  $\text{CH}_2\text{ArH}$ ), 7.06 (d,  $J = 7.8$  Hz, 1H, 4-ArH), 7.02 (d,  $J = 7.2$  Hz, 1H, 6-ArH), 6.67 (t,  $J = 7.5$  Hz, 1H, 5-ArH), 6.34 (d,  $J = 7.8$  Hz, 1H, 7-ArH), 5.64 (s, 1H, NCHO), 4.50 (Abq,  $J = 15.9$  Hz,  $\Delta\nu = 18.3$ , 2H,  $\text{NCH}_2\text{Ar}$ ), 3.94 (dd,  $J = 7.2, 8.1$  Hz, 1H  $\text{CH}_2\text{CHHO}$ ), 3.52-3.44 (m, 1H), 3.25 (dd,  $J = 3.3, 11.7$  Hz, 1H), 2.78 (dd,  $J = 11.7, 18.6$  Hz, 1H), 2.42-2.25 (m, 2H), 2.14-2.0 (m, 1H), 1.38 (s, 9H).  $^{13}\text{C}$  NMR (75 MHz,  $\text{CDCl}_3$ )  $\delta$  199.4, 171, 150., 138.1, 130.0, 128.9, 128.4, 127.4, 127.1, 123.1, 117.8, 105.7, 98.3, 81.7, 66.5, 57.6, 48.9, 46.1, 43.4, 38.5, 28.0, HRMS (CI) exact mass calcd for  $(\text{C}_{25}\text{H}_{28}\text{NO}_4)$  requires  $m/z$  406.2018, found  $m/z$  406.2027  $[\alpha]_{\text{D}} = -94$  ( $c = 1.25$ ,  $\text{CHCl}_3$ ). The enantiomeric ratio was determined by HPLC analysis of the alcohol, obtained by  $\text{NaBH}_4$  reduction of the aldehyde, using a Chiracel AS and AS guard column (2% isopropyl alcohol/hexanes, 1 ml/min); *Minor* isomer  $t_{\text{r}} = 20.7$  min and *Major* isomer  $t_{\text{r}} = 23.5$  min. The diastereomeric ratio was determined by NMR analysis.

## Determination of Absolute Stereochemistry

### 1. Determination of the absolute stereochemistry of (*S*)-6-Bromo-8-(3-methyl-but-2-enyl)-3a-(3-oxo-propyl)-3,3a,8,8a-tetrahydro-2*H*-pyrrolo[2,3-*b*]indole-1-carboxylic acid *tert*-butyl ester by correlation to (*S*)-flustramine B.

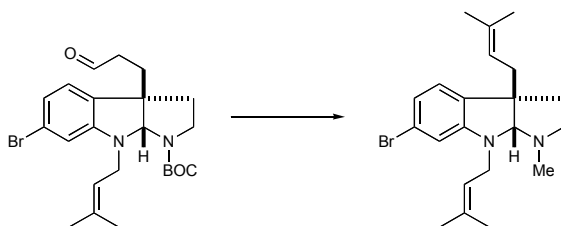

### (*S*)-6-Bromo-8-(3-methyl-but-2-enyl)-3a-(3-oxo-propyl)-3,3a,8,8a-tetrahydro-2*H*-pyrrolo[2,3-*b*]indole-1-carboxylic acid *tert*-butyl ester.

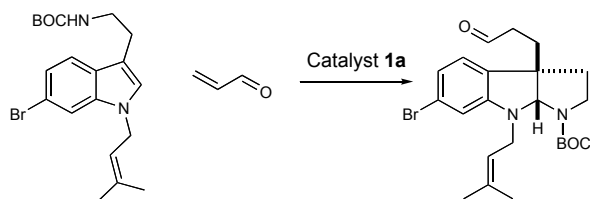

Prepared according to the general procedure from acrolein (0.17 ml, 2.56 mmol), *N*-10-BOC-1-Prenyl-6-Bromotryptamine (258 mg, 0.64 mmol), and (*2S*, *5S*)-catalyst **1** (31 mg, 0.13 mmol), and trifluoroacetic acid (9.8  $\mu\text{l}$ , 0.13 mmol) in  $\text{CH}_2\text{Cl}_2$  (4.2 ml) at  $-84^\circ\text{C}$  for 72 h to

provide the title compound as a colorless oil (231 mg, 78% yield, 80% ee) after silica gel chromatography in 10% EtOAc/hexanes as a colorless, viscous oil. IR (thin film) 2971, 2929, 2717, 1723, 1695, 1601, 1490, 1447, 1394, 1366, 1250, 1219, 1158  $\text{cm}^{-1}$ ;  $^1\text{H}$  NMR (300 MHz,  $\text{CDCl}_3$ )  $\delta$  9.63 (s, 1H), 6.75 (d,  $J = 7.8$  Hz, 1H), 6.69 (d,  $J = 7.8$  Hz, 1H), 6.38 (s, 1H), 5.25 (d,  $J = 41.1$  Hz, 1H), 5.08 (br s, 1H), 3.65-4.09 (m, 3H), 2.94 (br s, 1H), 1.89-2.43 (m, 6H), 1.76 (s, 3H), 1.71 (s, 3H), 1.43 (s, 9H);  $^{13}\text{C}$  NMR (75 MHz,  $\text{CDCl}_3$ )  $\delta$  201.2, 154.7, 153.8, 151.8, 134.7, 134.4, 130.3, 123.9, 122.7, 121.5, 120.8, 120.0, 119.7, 109.0, 84.7, 84.1, 80.9, 80.2, 56.5, 55.2, 45.7, 45.2, 43.8, 40.3, 39.0, 38.3, 31.2, 28.7, 26.1, 18.5; HRMS (CI) exact mass calcd for  $(\text{C}_{23}\text{H}_{31}\text{BrN}_2\text{O}_3 + \text{Na} + \text{CH}_3\text{OH}^+)$  requires  $m/z$  517.1678, found  $m/z$  517.1674;  $[\alpha]_{\text{D}}^{20} = -218.9$  ( $c = 1.0$ ,  $\text{CHCl}_3$ ).

The enantiomeric purity was determined after conversion to alcohol.

**(S)-6-Bromo-3a-(3-hydroxypropyl)-8-(3-methyl-but-2-enyl)-3,3a,8,8a-tetrahydro-2H-pyrrolo[2,3-b]indole-1-carboxylic acid *tert*-butyl ester.** To a solution of the previous

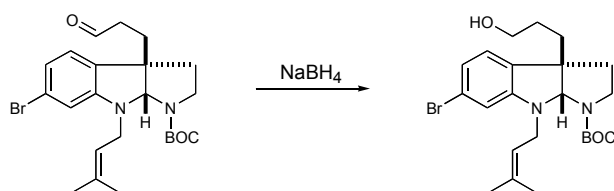

compound (496 mg, 1.07 mmol) in MeOH (5.0 ml) at 0°C was added sodium borohydride (243 mg, 6.42 mmol). After stirring for 15 min at this temperature, the reaction mixture was quenched with 0.5 N HCl solution and extracted with EtOAc. The combined extract was washed with brine, dried over sodium sulfate, concentrated, and purified by column chromatography (silica, 30% EtOAc in hexanes) to provide the title compound (450 mg, 90%) as a colorless, viscous oil; 80% ee; IR (thin film) 3207, 2965, 2934, 1690, 1600, 1577, 1491, 1444, 1390, 1366, 1253, 1222, 1155, 1077, 1058  $\text{cm}^{-1}$ ;  $^1\text{H}$  NMR (300 MHz,  $\text{CDCl}_3$ )  $\delta$  6.77 (d,  $J = 7.8$  Hz, 1H), 6.70 (d,  $J = 7.8$  Hz, 1H), 6.37 (s, 1H), 5.30 (d,  $J = 43.5$  Hz, 1H), 5.09 (br s, 1H), 3.62-4.08 (m, 3H), 3.54 (br s, 2H), 2.96 (br s, 1H), 1.21-2.02 (m, 6H), 1.73 (s, 3H), 1.70 (s, 3H), 1.47 (s, 9H);  $^{13}\text{C}$  NMR (75 MHz,  $\text{CDCl}_3$ )  $\delta$  154.8, 153.9, 151.8, 151.7, 134.4, 134.2, 131.6, 123.9, 122.2, 121.8, 121.1, 119.7, 119.4, 108.8, 85.1, 84.5, 80.8, 80.1, 63.1, 57.0, 55.8, 45.7, 45.2, 44.0, 38.9, 38.2, 35.8, 35.7, 28.8, 26.1, 26.0, 18.4; HRMS (CI) exact mass calcd for  $(\text{C}_{23}\text{H}_{33}\text{BrN}_2\text{O}_3 + \text{Na}^+)$  requires  $m/z$  487.1572, found  $m/z$  487.1582.  $[\alpha]_{\text{D}}^{26} = -204.1$  ( $c = 1.0$ ,  $\text{CHCl}_3$ ).

The enantiomeric purity was determined by HPLC with a Chiralcel ODH column and ODH guard column (4% EtOH/hexanes, 1 ml/min flow);  $t_{\text{r}} = 11.4$  min and 14.1 min.

**(S)-6-Bromo-3a-(3-Methanesulfonyloxypropyl)-8-(3-methyl-but-2-enyl)-3,3a,8,8a-tetrahydro-2H-pyrrolo[2,3-b]indole-1-carboxylic acid *tert*-butyl ester.**

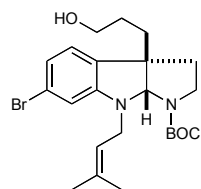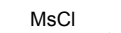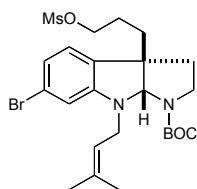

previous compound (115 mg, 0.25 mmol) and triethylamine (45  $\mu$ l, 0.33 mmol) in  $\text{CH}_2\text{Cl}_2$  (2.5 mL) at  $0^\circ\text{C}$  was added dropwise methanesulfonyl chloride (23  $\mu$ l, 0.30 mmol).

After stirring for 10 min at this temperature, the mixture was allowed to warm up to room temperature and stirred for 10 min. The reaction was quenched with saturated  $\text{NH}_4\text{Cl}$  solution and extracted with  $\text{CH}_2\text{Cl}_2$ . The combined extract was washed with brine, dried over sodium sulfate, concentrated, and purified by column chromatography (silica, 20–30% EtOAc in hexanes) to provide the title compound (133 mg, 99%) as a colorless, viscous oil; IR (thin film) 2940, 2820, 2730, 2635, 1457, 1437, 1343, 1280, 1234, 1198, 1167, 1107, 1089  $\text{cm}^{-1}$ ;  $^1\text{H}$  NMR (300 MHz,  $\text{CDCl}_3$ )  $\delta$  6.78 (d,  $J = 7.8$  Hz, 1H), 6.73 (d,  $J = 7.8$  Hz, 1H), 6.40 (s, 1H), 5.30 (d,  $J = 46.2$  Hz, 1H), 5.10 (br s, 1H), 3.69–4.18 (m, 5H), 2.97 (s, 3H), 2.95 (br s, 1H), 1.65–2.06 (m, 6H), 1.73 (s, 3H), 1.70 (s, 3H), 1.46 (s, 9H);  $^{13}\text{C}$  NMR (75 MHz,  $\text{CDCl}_3$ )  $\delta$  154.7, 153.9, 151.8, 151.7, 134.6, 134.4, 130.8, 123.9, 122.5, 121.6, 120.9, 119.9, 119.6, 118.9, 84.9, 84.2, 80.9, 80.1, 70.1, 56.8, 55.5, 45.7, 45.2, 43.9, 39.0, 38.2, 37.6, 35.4, 28.7, 26.1, 25.4, 18.5; HRMS (CI) exact mass calcd for  $(\text{C}_{24}\text{H}_{35}\text{BrN}_2\text{O}_5\text{S} + \text{Na}^+)$  requires  $m/z$  565.1348, found  $m/z$  565.1337.  $[\alpha]_D^{22} = -204.3$  ( $c = 1.0$ ,  $\text{CHCl}_3$ ).

**(S)-3a-Allyl-6-bromo-8-(3-methyl-but-2-enyl)-3,3a,8,8a-tetrahydro-2H-pyrrolo[2,3-b]indole-1-carboxylic acid *tert*-butyl ester.**

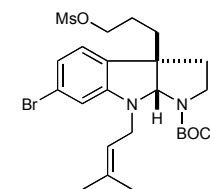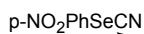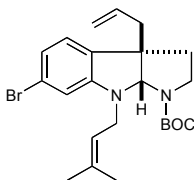

To a slurry of 2-nitrophenyl selenocyanate (409 mg, 1.80 mmol) in EtOH (6.0 ml) at  $0^\circ\text{C}$  was added sodium borohydride (75 mg, 1.98 mmol) and stirred for 30 min. The reaction mixture was allowed to warm up to room temperature

and added dropwise a solution of the previous compound (490 mg, 0.90 mmol) in EtOH (7.0 ml). After stirring for 3 h. at this temperature, the reaction mixture was diluted with  $\text{CH}_2\text{Cl}_2$  and washed with water and dried over sodium sulfate, and the solvent was removed *in vacuo*. The product was used directly in the next reaction without further purification.  $^1\text{H}$  NMR (300 MHz,

CDCl<sub>3</sub>) δ 8.26 (dd, *J* = 1.5, 8.1 Hz, 1H), 7.44-7.49 (m, 1H), 7.23-7.34 (m, 2H), 6.76 (d, *J* = 7.8 Hz, 1H), 6.70 (d, *J* = 7.8 Hz, 1H), 6.37 (s, 1H), 5.30 (d, *J* = 46.2 Hz, 1H), 5.07 (br s, 1H), 3.67-4.08 (m, 3H), 2.95 (br s, 1H), 2.83 (t, *J* = 6.6 Hz, 1H), 1.78-2.05 (m, 6H), 1.75 (s, 3H), 1.71 (s, 3H), 1.46 (s, 9H)

To a solution of selenide from the reaction above in THF (13 ml) at 0°C was added dropwise 30% H<sub>2</sub>O<sub>2</sub> (0.46 ml, 4.5 mmol) and allowed to warm up to room temperature. After stirring for 20 min at this temperature, the reaction mixture was stirred for 2 h at 50°C and quenched with 10% Na<sub>2</sub>S<sub>2</sub>O<sub>4</sub> solution, and extracted with CH<sub>2</sub>Cl<sub>2</sub>. The combined extract was washed with brine, dried over sodium sulfate, concentrated, and purified by column chromatography (silica, 3–5% EtOAc in hexanes) to provide the title compound (364 mg, 90%) as a pale yellow oil; IR (thin film) 2965, 2926, 1700, 1601, 1490, 1395, 1366, 1245, 1162 cm<sup>-1</sup>; <sup>1</sup>H NMR (300 MHz, CDCl<sub>3</sub>) δ 6.80 (d, *J* = 7.8 Hz, 1H), 6.71 (dd, *J* = 7.8 Hz, 1H), 6.39 (s, 1H), 5.62 (dt, 1H, *J* = 7.2, 24.6 Hz), 5.32 (d, *J* = 31.5 Hz, 1H), 5.00-5.14 (m, 3H), 3.66-4.11 (m, 3H), 3.00 (dd, *J* = 6.0, 15.3 Hz, 1H), 2.49 (dd, *J* = 6.0, 13.8 Hz, 1H), 2.37 (dd, *J* = 7.8, 13.8 Hz, 1H), 1.98 (t, *J* = 5.1 Hz, 2H), 1.72 (s, 3H), 1.69 (s, 3H), 1.47 (s, 9H); <sup>13</sup>C NMR (75 MHz, CDCl<sub>3</sub>) δ 154.7, 153.9, 151.8, 151.5, 134.2, 133.8, 131.7, 124.1, 122.3, 121.7, 121.2, 119.7, 119.4, 118.7, 108.9, 84.9, 84.4, 80.6, 79.9, 56.8, 55.7, 45.8, 45.3, 44.1, 43.5, 37.9, 37.4, 28.8, 26.1, 18.5; HRMS (CI) exact mass calcd for (C<sub>23</sub>H<sub>31</sub>BrN<sub>2</sub>O<sub>2</sub>+Na<sup>+</sup>) requires *m/z* 469.1466, found *m/z* 469.1471.; [α]<sub>D</sub><sup>24</sup> = -159.5 (*c* = 1.0, CHCl<sub>3</sub>).

**(S)-6-Bromo-3a,8-bis-(3-methyl-but-2-enyl)-3,3a,8,8a-tetrahydro-2H-pyrrolo[2,3-*b*]indole-1-carboxylic acid *tert*-butyl ester.** To a solution of Grubbs' catalyst (20 mg, 0.02 mmol) in

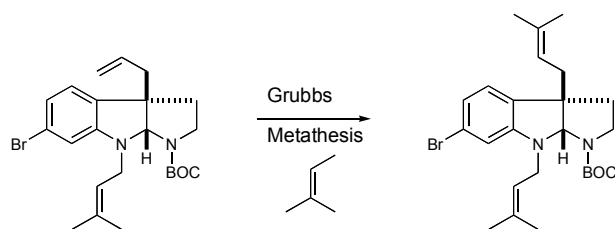

CH<sub>2</sub>Cl<sub>2</sub> (3.0 ml) were simultaneously added via syringe 3.1 ml of 2-methyl-2-butene and a solution of the previous compound (350 mg, 0.78 mmol) in CH<sub>2</sub>Cl<sub>2</sub> (3.8 ml) at room temperature. The reaction mixture was warmed

up at 40 °C and stirred for 1 h. The solvent and remained 2-methyl-2-butene were removed *in vacuo*. The crude material was purified by column chromatography (silica, 3% EtOAc in hexanes) to provide the title compound (350 mg, 94%) as a pale yellow oil; IR (thin film) 2973, 2927, 1700, 1601, 1490, 1447, 1394, 1365, 1249, 1217, 1158 cm<sup>-1</sup>; <sup>1</sup>H NMR (300 MHz, CDCl<sub>3</sub>)

$\delta$  6.79 (d,  $J = 6.9$  Hz, 1H), 6.70 (d,  $J = 6.6$  Hz, 1H), 6.40 (s, 1H), 5.30 (d,  $J = 27.6$  Hz, 1H), 5.10 (br s, 1H), 5.00 (br t,  $J = 7.2$  Hz, 1H), 3.62-4.05 (m, 3H), 3.00 (br s, 1H), 2.36 (d,  $J = 7.2$  Hz, 2H), 1.94-2.03 (m, 2H), 1.72 (s, 3H), 1.69 (s, 3H), 1.67 (s, 3H), 1.54 (s, 3H), 1.46 (s, 9H);  $^{13}\text{C}$  NMR (75 MHz,  $\text{CDCl}_3$ )  $\delta$  154.8, 154.0, 151.6, 151.3, 135.0, 134.2, 132.4, 123.9, 122.1, 121.6, 121.2, 119.7, 119.4, 109.0, 84.9, 84.6, 80.5, 79.8, 57.2, 56.1, 46.0, 45.3, 44.2, 43.9, 37.6, 37.4, 37.1, 28.8, 26.3, 26.1, 26.0, 18.4; HRMS (CI) exact mass calcd for  $(\text{C}_{25}\text{H}_{35}\text{BrN}_2\text{O}_2 + \text{Na}^+)$  requires  $m/z$  497.1779, found  $m/z$  497.1796.;  $[\alpha]_{\text{D}}^{29} = -169.5$  ( $c = 1.0$ ,  $\text{CHCl}_3$ ).

**(S)-6-bromo-1-methyl-3a,8-bis-(3-methyl-but-2-enyl)-(3ar,8ac)-1,2,3,3a,8,8a-hexahydro-pyrrolo[2,3-*b*]indole, flustramine B.** To a solution of the previous compound (55 mg, 0.11 mmol) in  $\text{CH}_3\text{CN}$  (1.32 ml) at  $0^\circ\text{C}$  was added dropwise trimethylsilyl iodide (33  $\mu\text{l}$ , 0.23 mmol).

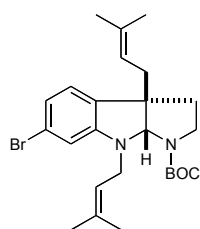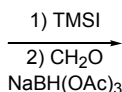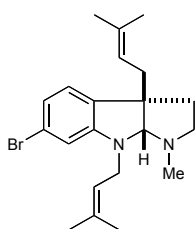

After stirring for 15 min. at this temperature, the reaction mixture was quenched with sat.  $\text{NaHCO}_3$  solution, and extracted with  $\text{CH}_2\text{Cl}_2$ . The combined extract was washed with brine and dried over sodium sulfate, and the solvent

was removed *in vacuo*. The product was used directly in the next reaction without further purification.  $^1\text{H}$  NMR (300 MHz,  $\text{CDCl}_3$ )  $\delta$  6.81 (d,  $J = 7.5$  Hz, 1H), 6.68 (dd,  $J = 1.8, 7.8$  Hz, 1H), 6.40 (d,  $J = 1.8$  Hz, 1H), 5.17 (br t, 1H,  $J = 7.2$  Hz), 5.02 (br t, 1H,  $J = 7.8$  Hz), 4.65 (s, 1H), 3.82 (dd,  $J = 7.2, 15.9$  Hz, 1H), 3.74 (dd,  $J = 6.6, 15.3$  Hz, 1H), 3.01 (ddd, 1H,  $J = 1.5, 6.6, 10.5$  Hz), 2.68 (ddd, 1H,  $J = 6.0, 10.8, 17.1$  Hz), 2.40 (d,  $J = 6.9$  Hz, 2H), 1.84-1.96 (m, 2H), 1.73 (s, 6H), 1.70 (s, 3H), 1.57 (s, 3H)

To a solution of amine from the reaction above in THF (1.2 ml) at  $-10^\circ\text{C}$  was added 37% formaldehyde (43  $\mu\text{l}$ , 0.7 mmol) and sodium triacetoxyborohydride (148 mg, 0.7 mmol). The reaction mixture was warmed to room temperature, stirred for 30 min, quenched with water, and extracted with EtOAc. The combined extract was washed with 0.5 N KOH solution and brine, dried over sodium sulfate, concentrated, and purified by column chromatography (silica, 40–50% EtOAc in hexanes) to provide the title compound (38 mg, 89%) as a colorless oil; IR (thin film) 2963, 2927, 2854, 2789, 1560, 1485, 1444, 1345, 1250, 1124  $\text{cm}^{-1}$ ;  $^1\text{H}$  NMR (300 MHz,  $\text{CDCl}_3$ )  $\delta$  6.79 (d,  $J = 8.4$  Hz, 1H), 6.73 (dd,  $J = 1.8, 7.8$  Hz, 1H), 6.49 (d,  $J = 1.8$  Hz, 1H), 5.12 (br t,  $J = 6.3$  Hz, 1H), 4.93 (br t,  $J = 7.8$  Hz, 1H), 4.26 (s, 1H), 3.87 (dd,  $J = 6.0, 16.5$  Hz, 1H), 3.79 (dd,  $J = 7.2, 16.2$  Hz, 1H), 2.66 (ddd, 1H,  $J = 3.3, 6.6, 9.6$  Hz), 2.55 (ddd, 1H,  $J = 6.0, 9.3,$

15.0 Hz), 2.47 (s, 3H), 2.38 (d,  $J = 6.6$  Hz, 2H), 1.82-2.07 (m, 2H), 1.71 (s, 6H), 1.65 (s, 3H), 1.56 (s, 3H);  $^{13}\text{C}$  NMR (75 MHz,  $\text{CDCl}_3$ )  $\delta$  153.2, 135.0, 134.9, 134.0, 124.2, 121.5, 120.5, 120.8, 120.5, 120.1, 110.2, 91.8, 57.1, 53.1, 46.6, 39.3, 38.6, 38.5, 26.3, 26.1, 18.5; HRMS (CI) exact mass calcd for  $(\text{C}_{21}\text{H}_{29}\text{BrN}_2^+)$  requires  $m/z$  388.1514, found  $m/z$  388.1519.;  $[\alpha]_{\text{D}}^{22} = -93.9$  ( $c = 1.6$ ,  $\text{CHCl}_3$ ).  $[\alpha]_{\text{D}}^{23} = -93.5$  ( $c = 1.5$ , EtOH). Lit. (3)  $[\alpha]_{\text{D}}^{20} = -511$  ( $c = 0.0039$ , EtOH).

**2. Determination of the absolute stereochemistry of (*S*)-6-bromo-3a-(3-hydroxy-propyl)-8-(3-phenyl-allyl)-3,3a,8,8a-tetrahydro-2*H*-pyrrolo[2,3-*b*]indole-1-carboxylic acid *tert*-butyl ester by x-ray crystallography.**

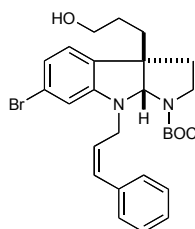

**(*S*)-6-Bromo-3a-(3-hydroxy-propyl)-8-(3-phenyl-allyl)-3,3a,8,8a-tetrahydro-2*H*-pyrrolo[2,3-*b*]indole-1-carboxylic acid *tert*-butyl ester.**

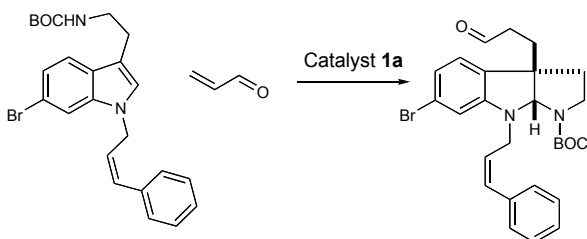

To a solution of compound *N*-10-BOC-1-(3-phenyl-allyl)-6-bromotryptamine (50 mg, 0.11 mmol), (*S,S*)-catalyst **1** (5.4 mg, 0.022 mmol), and trifluoroacetic acid (1.7  $\mu\text{l}$ , 0.022 mmol) in  $\text{CH}_2\text{Cl}_2$  (0.2 ml) at  $-60^\circ\text{C}$  was added acrolein (30  $\mu\text{l}$ , 0.44 mmol). After stirring for 36 h at

this temperature, the reaction mixture was quenched with saturated  $\text{NaHCO}_3$  solution, and extracted with  $\text{CH}_2\text{Cl}_2$ . The combined extract was washed with brine, dried over sodium sulfate, and concentrated. The product was used directly in the next reaction without further purification.

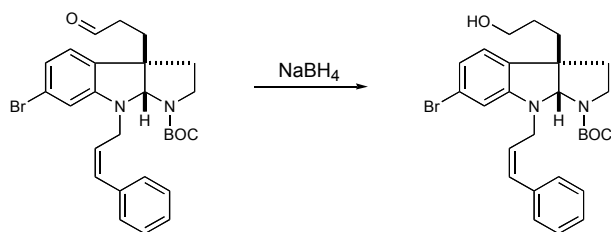

To a solution of amine from the reaction above in MeOH (0.2 ml) at  $0^\circ\text{C}$  was added sodium borohydride (25 mg, 0.66 mmol). After stirring for 15 min at this temperature, the reaction mixture was

quenched with 0.5 N HCl solution and extracted with EtOAc. The combined extract was washed with brine, dried over sodium sulfate, concentrated, and purified by column chromatography



(silica, 30% EtOAc/hexanes) to provide the title compound (33 mg, 58%) as a colorless, solid; 82% ee; IR (thin film) 3437, 2928, 1690, 1601, 1490, 1398, 1366, 1218, 1156, 1058  $\text{cm}^{-1}$ ;  $^1\text{H}$  NMR (300 MHz,  $\text{CDCl}_3$ )  $\delta$  7.20-7.34 (m, 5H), 6.82 (d,  $J = 7.5$  Hz, 1H), 6.75 (d,  $J = 7.5$  Hz, 1H), 6.53 (d,  $J = 17.1$  Hz, 1H), 6.50 (s, 1H), 6.11-6.22 (m, 1H), 5.37 (d,  $J = 46.5$  Hz, 1H), 5.09 (br s, 1H), 3.70-4.23 (m, 3H), 3.54 (br d,  $J = 6.6$  Hz, 2H), 2.97-3.11 (m, 1H), 1.21-2.09 (m, 6H), 1.45 (s, 9H);  $^{13}\text{C}$  NMR (75 MHz,  $\text{CDCl}_3$ )  $\delta$  154.8, 153.7, 151.7, 1374.2, 131.5, 131.2, 128.8, 128.6, 127.7, 127.5, 126.5, 125.8, 124.1, 122.4, 120.3, 119.9, 109.1, 108.9, 84.9, 84.6, 80.9, 80.2, 63.1, 57.3, 56.0, 45.7, 45.1, 39.0, 38.4, 36.2, 35.9, 28.9, 28.7; HRMS (CI) exact mass calcd for ( $\text{C}_{27}\text{H}_{33}\text{BrN}_2\text{O}_3 + \text{H}$ ) requires  $m/z$  513.1750, found  $m/z$  513.1750.  $[\alpha]_{\text{D}}^{26} = -116.2$  ( $c = 3.3$ ,  $\text{CHCl}_3$ ). The enantiomeric purity was determined by HPLC with a Chiralcel ODH column and ODH guard column (4% EtOH/hexanes, 1 ml/min flow);  $t_{\text{r}} = 20.5$  min and 22.2 min. This compound was crystallized from evaporation of deuterated chloroform. Coordinates and report are appended as JFA01.

**3. Determination of the absolute stereochemistry of (2*S*,3*R*,3*aR*)-8-allyl-3*a*-(1-methoxycarbonyl-3-oxo-propyl)-3,3*a*,8,8*a*-tetrahydro-2*H*-pyrrolo[2,3-*b*]indole-1-carboxylic acid *tert*-butyl ester by derivatization to (2*S*,3*R*,3*aR*)-8-allyl-3*a*-[3-(4-(*S*)-benzyl-2-oxo-oxazolidin-3-yl)-1-methoxycarbonyl-3-oxo-propyl]-3,3*a*,8,8*a*-tetrahydro-2*H*-pyrrolo[2,3-*b*]indole-1-carboxylic acid *tert*-butyl ester and subsequent x-ray crystallography.**

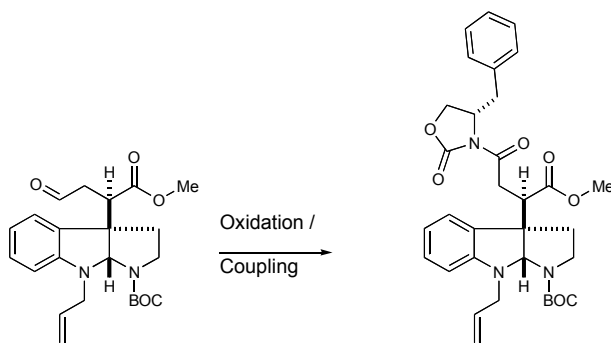

**(2*S*,3*R*,3*aR*)-8-Allyl-3*a*-[3-(4-(*S*)-benzyl-2-oxo-oxazolidin-3-yl)-1-methoxycarbonyl-3-oxo-propyl]-3,3*a*,8,8*a*-tetrahydro-2*H*-pyrrolo[2,3-*b*]indole-1-carboxylic acid *tert*-butyl ester.** (2*S*,3*R*,3*aR*)-8-Allyl-3*a*-(1-methoxycarbonyl-3-oxo-propyl)-3,3*a*,8,8*a*-tetrahydro-2*H*-pyrrolo[2,3-*b*]indole-1-carboxylic acid *tert*-butyl ester was dissolved in *tert*-butyl alcohol (4.5 ml) and 2-methyl-2-butene (1.2 ml) and subsequently was stirred for 10 min. To this solution was added an

aqueous solution (1.8 ml) of NaClO<sub>2</sub> (90.4 mg, 2.23 mmol) and NaH<sub>2</sub>PO<sub>4</sub> (138 mg, 1.56 mmol) in one portion. The reaction mixture was stirred at room temperature for 2 h. The organics were removed by concentrating *in vacuo*. The residue was diluted with 5 ml of H<sub>2</sub>O, and adjusted to a neutral pH with 1 M HCl. Extraction with EtOAc (3 x 10 ml), drying over Na<sub>2</sub>SO<sub>4</sub>, and concentration *in vacuo* provided (2*S*,3*R*,3*aR*)-2-(8-allyl-1-*tert*-butoxycarbonyl-2,3,8,8*a*-tetrahydro-1*H*-pyrrolo[2,3-*b*]indol-3*a*-yl)-succinic acid 1-methyl ester. This isolated residue was dissolved in THF (2 ml), TEA (65 μl, 0.468 mmol), and PivCl (27.5 μl, 0.223 mmol) and allowed to stir at room temperature for 15 min. To this solution was added LiCl (9.4 mg, 0.223 mmol) and (*S*)-4-benzyl-oxazolidin-2-one, which was stirred for an additional 8 h. The solution was diluted with 10 ml of H<sub>2</sub>O, and adjusted to a neutral pH with 1 M HCl. Extraction with Et<sub>2</sub>O (3 x 10 ml), drying over Na<sub>2</sub>SO<sub>4</sub>, and concentration *in vacuo* provided (2*S*,3*R*,3*aR*)-8-allyl-3*a*-[3-(4-(*S*)-benzyl-2-oxo-oxazolidin-3-yl)-1-methoxycarbonyl-3-oxo-propyl]-3,3*a*,8,8*a*-tetrahydro-2*H*-pyrrolo[2,3-*b*]indole-1-carboxylic acid *tert*-butyl ester. The resulting solid was crystallized from benzene/hexanes. Coordinates and report are appended as JFA03.

1. Perrin, D. D. & Armarego, W. L. F. (1988) *Purification of Laboratory Chemicals* (Pergamon Press, Oxford), 3<sup>rd</sup> Ed.
2. Still, W. C., Kahn, M. & Mitra, A. J. (1978) *J. Org. Chem.* **43**, 2923-2925.
3. Holst, P. B., Anthoni, U., Christophersen, C. & Nielsen, P. H. (1994) *J. Nat. Prod.* **57**, 997-1000.

## Appendix 1

### Contents

|           |                                              |
|-----------|----------------------------------------------|
| Table 4.  | Crystal data                                 |
| Figures   | Figures 5-9                                  |
| Table 5.  | Atomic Coordinates                           |
| Table 6.  | Full bond distances and angles (for deposit) |
| Table 7.  | Anisotropic displacement parameters          |
| Table 8.  | Hydrogen atomic coordinates                  |
| Table 9.  | Selected torsion angles                      |
| Table 10. | Hydrogen bond distances and angles           |

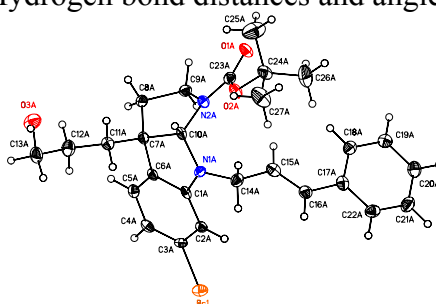

JFA01

**Note:** CCDC 197024 contains the supplementary crystallographic data for this paper. These data can be obtained free of charge via [www.ccdc.cam.ac.uk/data\\_request/cif](http://www.ccdc.cam.ac.uk/data_request/cif), by emailing [data\\_request@ccdc.cam.ac.uk](mailto:data_request@ccdc.cam.ac.uk), or by contacting The Cambridge Crystallographic Data Centre, 12, Union Road, Cambridge CB2 1EZ, UK; fax: +44 1223 336033. Structure factors are available from the authors via e-mail: [xray@caltech.edu](mailto:xray@caltech.edu)

**Table 4. Crystal data and structure refinement for JFA01 (CCDC 197024)**

|                         |                                                                 |
|-------------------------|-----------------------------------------------------------------|
| Empirical formula       | C <sub>27</sub> H <sub>33</sub> BrN <sub>2</sub> O <sub>3</sub> |
| Formula weight          | 513.46                                                          |
| Crystallization solvent | Hexanes/Dichloromethane                                         |
| Crystal habit           | Block                                                           |
| Crystal size            | 0.17 x 0.22 x 0.22 mm <sup>3</sup>                              |
| Crystal color           | Colorless                                                       |

### Data collection

|                                                                     |                                                                                            |
|---------------------------------------------------------------------|--------------------------------------------------------------------------------------------|
| Preliminary photos                                                  | Rotation                                                                                   |
| Type of diffractometer                                              | Bruker smart 1000                                                                          |
| Wavelength                                                          | 0.71073 Å MoK $\alpha$                                                                     |
| Data collection temperature                                         | 98(2) K                                                                                    |
| $\theta$ range for 18,881 reflections used in lattice determination | 2.45 to 28.05°                                                                             |
| Unit cell dimensions                                                | $a = 8.8345(4)$ Å<br>$b = 15.4918(7)$ Å<br>$c = 18.3034(9)$ Å<br>$\beta = 97.229(1)^\circ$ |
| Volume                                                              | 2485.1(2) Å <sup>3</sup>                                                                   |
| $Z$                                                                 | 4                                                                                          |
| Crystal system                                                      | Monoclinic                                                                                 |
| Space group                                                         | $P2_1$                                                                                     |
| Density (calculated)                                                | 1.372 g/cm <sup>3</sup>                                                                    |
| $F(000)$                                                            | 1072                                                                                       |
| Data collection program                                             | Bruker smart v5.054                                                                        |
| $\theta$ range for data collection                                  | 1.73 to 28.37°                                                                             |
| Completeness to $\theta = 28.37^\circ$                              | 95.2 %                                                                                     |
| Index ranges                                                        | $-11 \leq h \leq 11, -20 \leq k \leq 20, -24 \leq l \leq 24$                               |
| Data collection scan type                                           | $\omega$ scans at 7 $\phi$ settings                                                        |
| Data reduction program                                              | Bruker saint v6.022                                                                        |
| Reflections collected                                               | 51,296                                                                                     |
| Independent reflections                                             | 11,520 [ $R_{\text{int}} = 0.0576$ ]                                                       |
| Absorption coefficient                                              | 1.685 mm <sup>-1</sup>                                                                     |
| Absorption correction                                               | None                                                                                       |

**Table 4 (cont.)****Structure solution and refinement**

|                                                           |                                    |
|-----------------------------------------------------------|------------------------------------|
| Structure solution program                                | shelxs-97                          |
| Primary solution method                                   | Direct methods                     |
| Secondary solution method                                 | Difference Fourier map             |
| Hydrogen placement                                        | Difference Fourier map             |
| Structure refinement program                              | shelxl-97                          |
| Refinement method                                         | Full matrix least-squares on $F^2$ |
| Data/restraints/parameters                                | 11,520/1/603                       |
| Treatment of hydrogen atoms                               | Riding                             |
| Goodness-of-fit on $F^2$                                  | 1.255                              |
| Final $R$ indices [ $I > 2\sigma(I)$ , 9,294 reflections] | $R^1 = 0.0330$ , $wR^2 = 0.0561$   |
| $R$ indices (all data)                                    | $R^1 = 0.0461$ , $wR^2 = 0.0579$   |
| Type of weighting scheme used                             | Sigma                              |
| Weighting scheme used                                     | $w = 1/\sigma^2(F_o^2)$            |
| Maximum shift/error                                       | 0.002                              |
| Average shift/error                                       | 0.000                              |
| Largest difference peak and hole                          | 0.984 and -0.316 e.Å <sup>-3</sup> |

**Special Refinement Details**

There are two molecules in the asymmetric unit. The conformation of each is very similar, with the exception of the propyl alcohol side group bonded to C7 (see Fig. 7 and Table 6). Hydrogen bonds are formed between the hydroxyl group of this side group and the carbonyl oxygen of the group bonded to N2. All hydrogen atoms were restrained to ride on the atom to which they are bonded and the temperature factor set to 1.2 times the  $U_{eq}$  (1.5 times for methyl hydrogens) of the bonded atom. Hydroxyl hydrogens were allowed to rotate about the C-O bond and methyl hydrogens to rotate about the C-C to optimize the fit to electron density.

Refinement of  $F^2$  against ALL reflections. The weighted  $R$  factor ( $wR$ ) and goodness of fit ( $S$ ) are based on  $F^2$ , conventional  $R$  factors ( $R$ ) are based on  $F$ , with  $F$  set to zero for negative  $F^2$ . The threshold expression of  $F^2 > 2\sigma(F^2)$  is used only for calculating  $R$  factors(gt) etc. and is not relevant to the choice of reflections for refinement.

All estimated standard deviations (esds) (except the esd in the dihedral angle between two least squares (l.s.) planes) are estimated using the full covariance matrix. The cell esds are taken into account individually in the estimation of esds in distances, angles, and torsion angles; correlations between esds in cell parameters are only used when they are defined by crystal symmetry. An approximate (isotropic) treatment of cell esds is used for estimating esds involving l.s. planes.

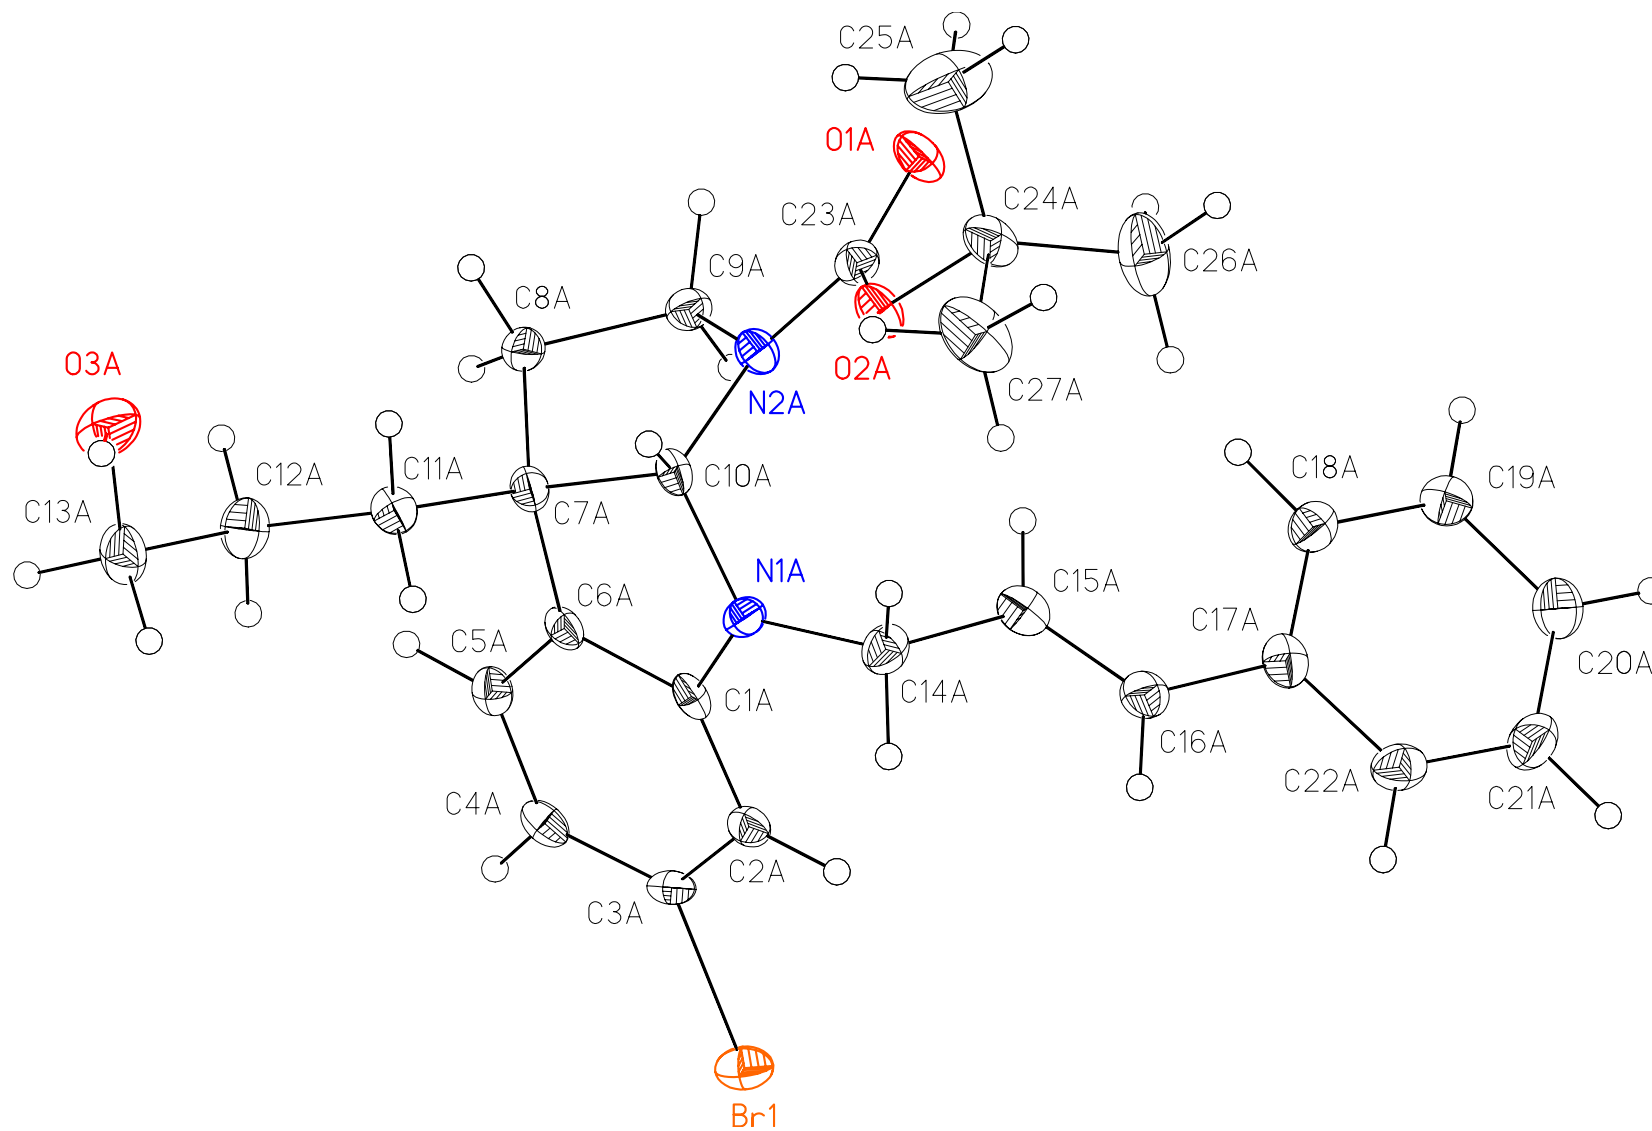

**Figure 5.** Molecule A of JFA01 with labels. Nonhydrogen atoms are shown with 50% probability ellipsoids.

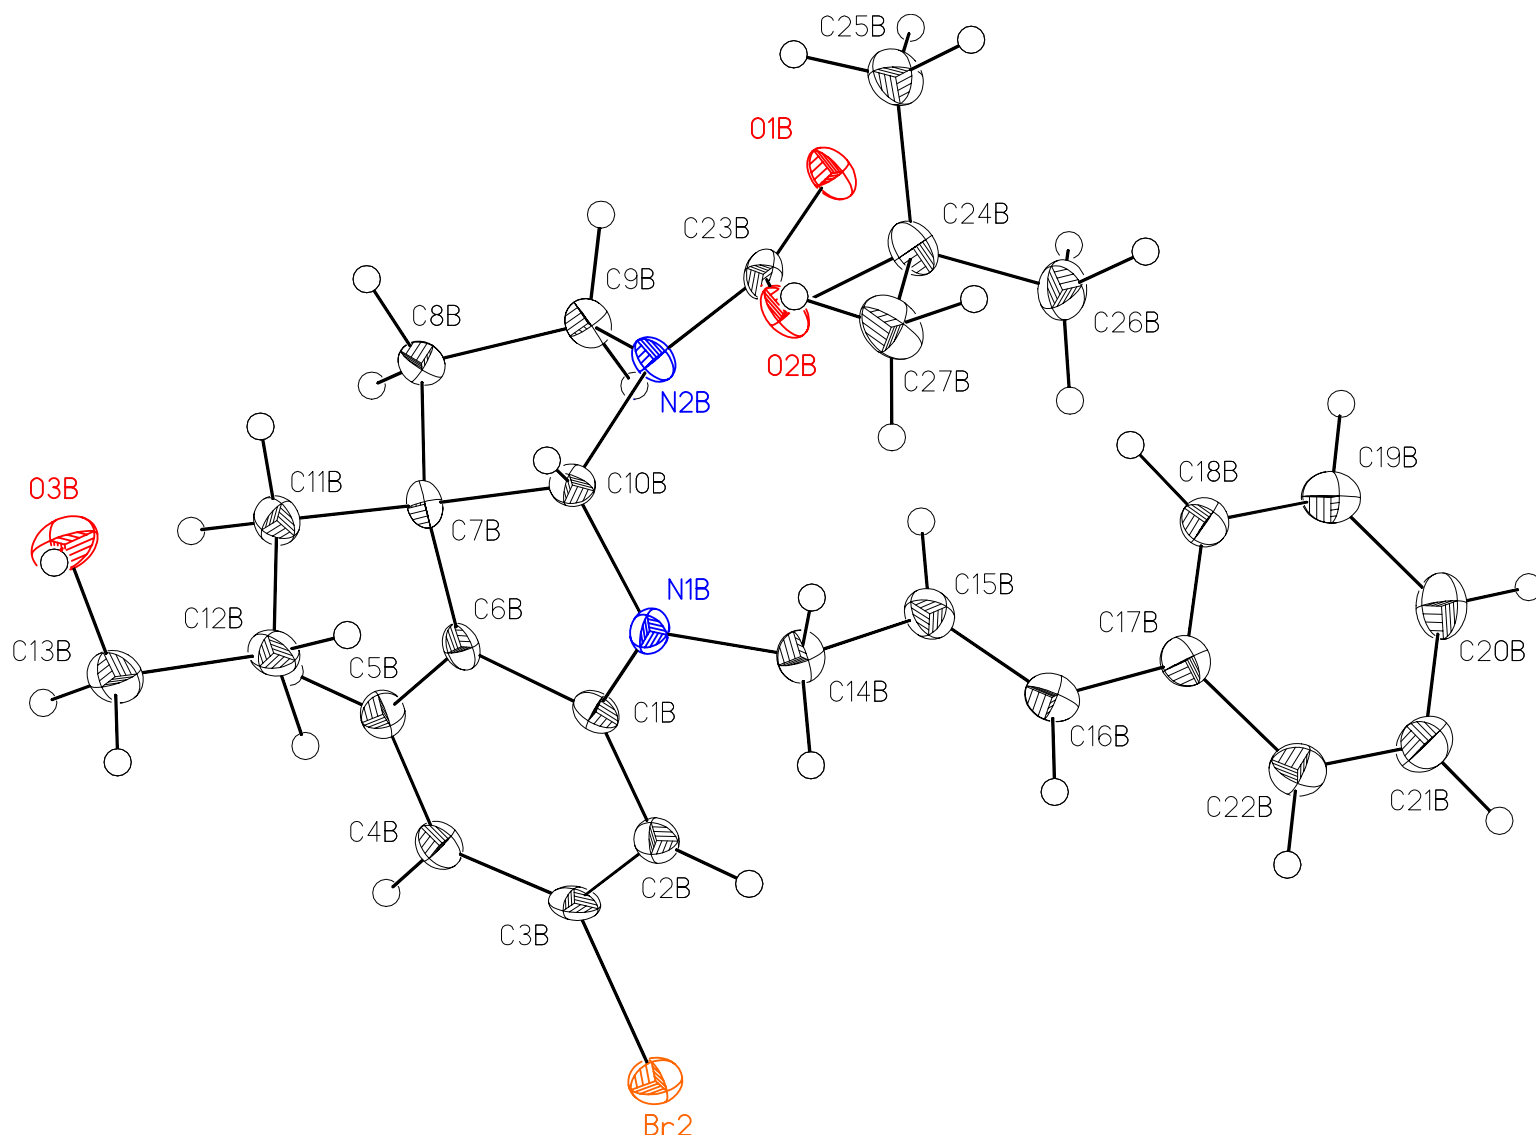

**Figure 6.** Molecule B of JFA01 with labels. Nonhydrogen atoms are shown with 50% probability ellipsoids.

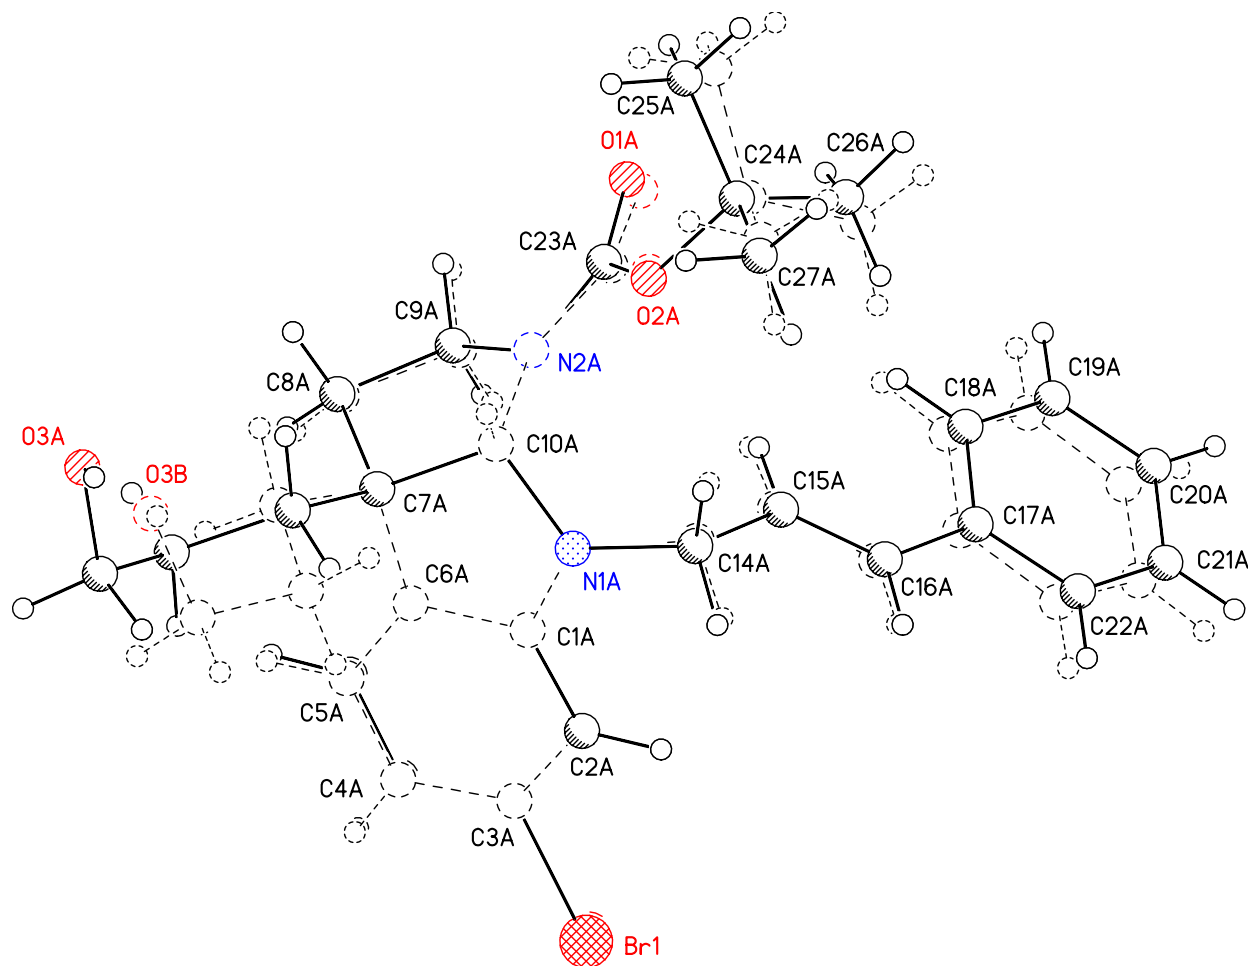

**Figure 7.** Molecule A and Molecule B of JFA01 superimposed on each other. Atoms N1, N2, and C1 through C10 (of both molecules) were used to define the overlap. Minor perturbations of the side groups bonded to N1 and N2 are evident. The largest difference can be seen in the torsion angles around the propyl alcohol side group bonded to C7 and terminated by the hydroxyl group at O3 (see Table 9).



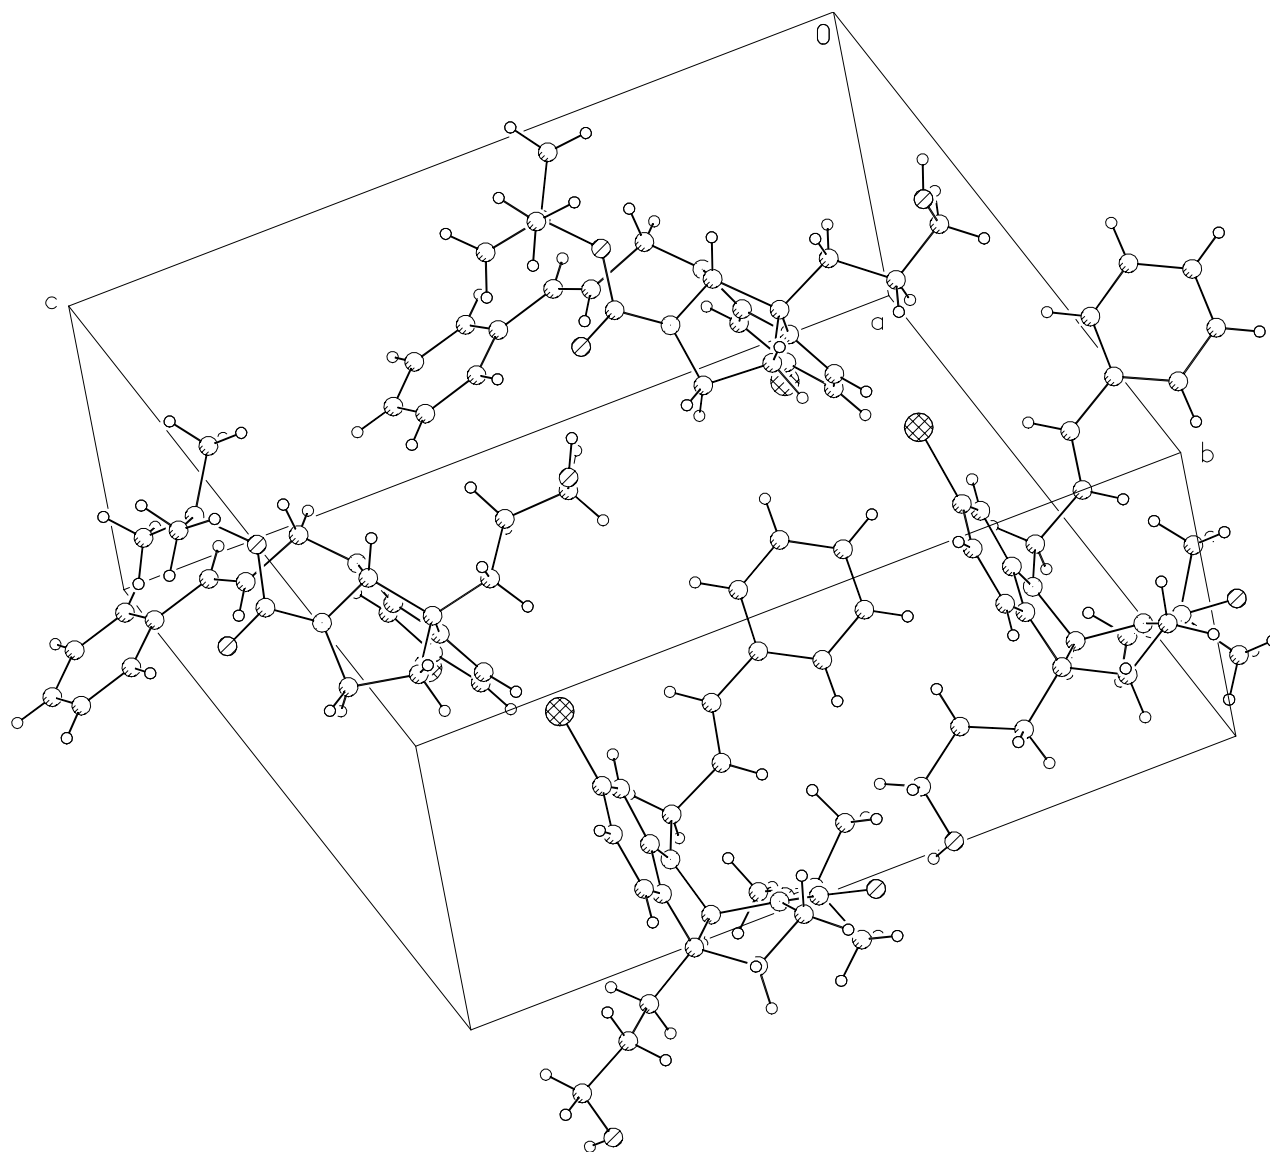

**Figure 8.** Unit cell contents of JFA01.

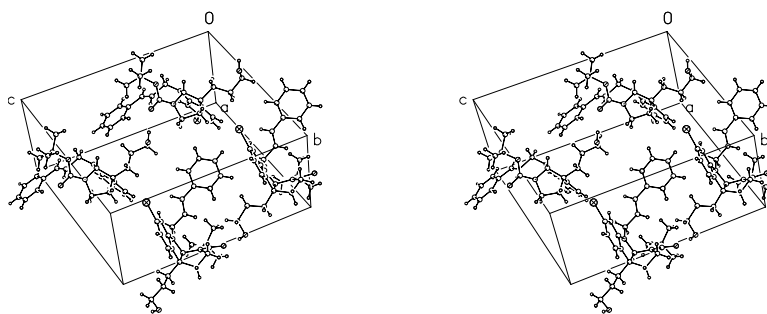

**Figure 9.** Stereo view of unit cell contents of JFA01.

**Table 5. Atomic coordinates ( $\times 10^4$ ) and equivalent isotropic displacement parameters ( $\text{\AA}^2 \times 10^3$ ) for JFA01 (CCDC 197024).  $U^{\text{eq}}$  is defined as the trace of the orthogonalized  $U^{ij}$  tensor.**

|        | x        | y        | z        | $U^{\text{eq}}$ |
|--------|----------|----------|----------|-----------------|
| Br(1)  | 4290(1)  | 8079(1)  | 7556(1)  | 21(1)           |
| O(1A)  | 11045(2) | 9700(1)  | 4643(1)  | 23(1)           |
| O(2A)  | 12094(2) | 8675(1)  | 5443(1)  | 20(1)           |
| O(3A)  | 13729(2) | 10844(1) | 8792(1)  | 32(1)           |
| N(1A)  | 9773(2)  | 8481(1)  | 6688(1)  | 16(1)           |
| N(2A)  | 10437(2) | 9596(1)  | 5813(1)  | 16(1)           |
| C(1A)  | 8489(3)  | 8759(2)  | 6989(1)  | 15(1)           |
| C(2A)  | 7183(2)  | 8289(2)  | 7069(1)  | 16(1)           |
| C(3A)  | 6082(3)  | 8706(2)  | 7418(1)  | 15(1)           |
| C(4A)  | 6223(3)  | 9549(2)  | 7667(1)  | 17(1)           |
| C(5A)  | 7542(3)  | 10004(2) | 7562(1)  | 16(1)           |
| C(6A)  | 8670(3)  | 9613(2)  | 7230(1)  | 15(1)           |
| C(7A)  | 10220(3) | 9943(2)  | 7069(1)  | 16(1)           |
| C(8A)  | 10099(3) | 10756(2) | 6595(1)  | 18(1)           |
| C(9A)  | 9604(3)  | 10422(2) | 5808(1)  | 17(1)           |
| C(10A) | 10714(3) | 9218(2)  | 6558(1)  | 15(1)           |
| C(11A) | 11392(3) | 9998(2)  | 7770(1)  | 18(1)           |
| C(12A) | 11093(3) | 10666(2) | 8325(1)  | 25(1)           |
| C(13A) | 12299(3) | 10626(2) | 8997(1)  | 26(1)           |
| C(14A) | 9856(3)  | 7662(2)  | 6307(1)  | 20(1)           |
| C(15A) | 8885(3)  | 7614(2)  | 5563(1)  | 21(1)           |
| C(16A) | 8085(3)  | 6926(2)  | 5321(2)  | 20(1)           |
| C(17A) | 7203(3)  | 6809(2)  | 4593(1)  | 19(1)           |
| C(18A) | 7148(3)  | 7419(2)  | 4028(1)  | 21(1)           |
| C(19A) | 6281(3)  | 7286(2)  | 3356(1)  | 22(1)           |
| C(20A) | 5473(3)  | 6519(2)  | 3228(2)  | 27(1)           |
| C(21A) | 5522(3)  | 5906(2)  | 3783(2)  | 27(1)           |
| C(22A) | 6362(3)  | 6051(2)  | 4450(2)  | 22(1)           |
| C(23A) | 11184(3) | 9358(2)  | 5245(1)  | 18(1)           |
| C(24A) | 12987(3) | 8233(2)  | 4918(1)  | 23(1)           |
| C(25A) | 14125(4) | 8850(2)  | 4664(2)  | 49(1)           |
| C(26A) | 11917(3) | 7875(2)  | 4285(2)  | 41(1)           |
| C(27A) | 13755(4) | 7523(2)  | 5389(2)  | 40(1)           |
| Br(2)  | 10555(1) | 3102(1)  | 7477(1)  | 22(1)           |
| O(1B)  | 4125(2)  | 4801(1)  | 10400(1) | 21(1)           |
| O(2B)  | 2696(2)  | 3987(1)  | 9543(1)  | 19(1)           |
| O(3B)  | 1307(2)  | 5642(1)  | 6120(1)  | 31(1)           |
| N(1B)  | 5063(2)  | 3729(1)  | 8287(1)  | 16(1)           |
| N(2B)  | 4519(2)  | 4817(1)  | 9198(1)  | 15(1)           |
| C(1B)  | 6405(3)  | 3947(2)  | 8011(1)  | 15(1)           |
| C(2B)  | 7642(3)  | 3425(2)  | 7927(1)  | 17(1)           |
| C(3B)  | 8815(3)  | 3802(2)  | 7598(1)  | 16(1)           |
| C(4B)  | 8803(3)  | 4646(2)  | 7356(1)  | 18(1)           |
| C(5B)  | 7540(3)  | 5154(2)  | 7458(1)  | 18(1)           |
| C(6B)  | 6367(3)  | 4815(2)  | 7792(1)  | 15(1)           |
| C(7B)  | 4898(3)  | 5235(2)  | 7972(1)  | 16(1)           |

|        |         |         |          |       |
|--------|---------|---------|----------|-------|
| C(8B)  | 5227(3) | 5985(2) | 8516(1)  | 18(1) |
| C(9B)  | 5587(3) | 5549(2) | 9264(1)  | 18(1) |
| C(10B) | 4212(3) | 4506(2) | 8432(1)  | 16(1) |
| C(11B) | 3862(3) | 5520(2) | 7275(1)  | 19(1) |
| C(12B) | 3430(3) | 4809(2) | 6728(1)  | 20(1) |
| C(13B) | 2621(3) | 5166(2) | 6001(1)  | 26(1) |
| C(14B) | 4911(3) | 2923(2) | 8674(1)  | 19(1) |
| C(15B) | 5941(3) | 2840(2) | 9403(1)  | 21(1) |
| C(16B) | 6704(3) | 2133(2) | 9618(1)  | 19(1) |
| C(17B) | 7655(3) | 1981(2) | 10327(2) | 19(1) |
| C(18B) | 7799(3) | 2574(2) | 10910(1) | 19(1) |
| C(19B) | 8752(3) | 2399(2) | 11555(2) | 23(1) |
| C(20B) | 9544(3) | 1636(2) | 11644(2) | 29(1) |
| C(21B) | 9411(3) | 1040(2) | 11073(2) | 28(1) |
| C(22B) | 8478(3) | 1217(2) | 10427(2) | 23(1) |
| C(23B) | 3815(3) | 4549(2) | 9767(1)  | 17(1) |
| C(24B) | 1873(3) | 3506(2) | 10079(1) | 21(1) |
| C(25B) | 975(3)  | 4129(2) | 10506(2) | 26(1) |
| C(26B) | 2967(3) | 2965(2) | 10581(1) | 29(1) |
| C(27B) | 795(3)  | 2950(2) | 9569(1)  | 30(1) |

---

**Table 6. Bond lengths [ $\text{\AA}$ ] and angles [ $^\circ$ ] for JFA01 (CCDC 197024)**

|               |          |               |          |
|---------------|----------|---------------|----------|
| Br(1)-C(3A)   | 1.901(2) | C(19A)-H(19A) | 0.9500   |
| O(1A)-C(23A)  | 1.215(3) | C(20A)-C(21A) | 1.386(4) |
| O(2A)-C(23A)  | 1.351(3) | C(20A)-H(20A) | 0.9500   |
| O(2A)-C(24A)  | 1.484(3) | C(21A)-C(22A) | 1.365(4) |
| O(3A)-C(13A)  | 1.404(3) | C(21A)-H(21A) | 0.9500   |
| O(3A)-H(3A)   | 0.8400   | C(22A)-H(22A) | 0.9500   |
| N(1A)-C(1A)   | 1.390(3) | C(24A)-C(25A) | 1.502(4) |
| N(1A)-C(10A)  | 1.450(3) | C(24A)-C(26A) | 1.506(4) |
| N(1A)-C(14A)  | 1.455(3) | C(24A)-C(27A) | 1.506(4) |
| N(2A)-C(23A)  | 1.351(3) | C(25A)-H(25A) | 0.9800   |
| N(2A)-C(10A)  | 1.475(3) | C(25A)-H(25B) | 0.9800   |
| N(2A)-C(9A)   | 1.476(3) | C(25A)-H(25C) | 0.9800   |
| C(1A)-C(2A)   | 1.388(3) | C(26A)-H(26A) | 0.9800   |
| C(1A)-C(6A)   | 1.397(3) | C(26A)-H(26B) | 0.9800   |
| C(2A)-C(3A)   | 1.388(3) | C(26A)-H(26C) | 0.9800   |
| C(2A)-H(2A)   | 0.9500   | C(27A)-H(27A) | 0.9800   |
| C(3A)-C(4A)   | 1.384(3) | C(27A)-H(27B) | 0.9800   |
| C(4A)-C(5A)   | 1.395(3) | C(27A)-H(27C) | 0.9800   |
| C(4A)-H(4A)   | 0.9500   | Br(2)-C(3B)   | 1.916(2) |
| C(5A)-C(6A)   | 1.372(3) | O(1B)-C(23B)  | 1.221(3) |
| C(5A)-H(5A)   | 0.9500   | O(2B)-C(23B)  | 1.342(3) |
| C(6A)-C(7A)   | 1.525(3) | O(2B)-C(24B)  | 1.491(3) |
| C(7A)-C(8A)   | 1.526(3) | O(3B)-C(13B)  | 1.415(3) |
| C(7A)-C(11A)  | 1.547(3) | O(3B)-H(3B)   | 0.8400   |
| C(7A)-C(10A)  | 1.558(3) | N(1B)-C(1B)   | 1.388(3) |
| C(8A)-C(9A)   | 1.540(3) | N(1B)-C(14B)  | 1.451(3) |
| C(8A)-H(8A1)  | 0.9900   | N(1B)-C(10B)  | 1.461(3) |
| C(8A)-H(8A2)  | 0.9900   | N(2B)-C(23B)  | 1.343(3) |
| C(9A)-H(9A1)  | 0.9900   | N(2B)-C(9B)   | 1.470(3) |
| C(9A)-H(9A2)  | 0.9900   | N(2B)-C(10B)  | 1.475(3) |
| C(10A)-H(10A) | 1.0000   | C(1B)-C(2B)   | 1.384(3) |
| C(11A)-C(12A) | 1.497(3) | C(1B)-C(6B)   | 1.402(3) |
| C(11A)-H(11A) | 0.9900   | C(2B)-C(3B)   | 1.390(3) |
| C(11A)-H(11B) | 0.9900   | C(2B)-H(2B)   | 0.9500   |
| C(12A)-C(13A) | 1.523(3) | C(3B)-C(4B)   | 1.381(3) |
| C(12A)-H(12A) | 0.9900   | C(4B)-C(5B)   | 1.397(3) |
| C(12A)-H(12B) | 0.9900   | C(4B)-H(4B)   | 0.9500   |
| C(13A)-H(13A) | 0.9900   | C(5B)-C(6B)   | 1.372(3) |
| C(13A)-H(13B) | 0.9900   | C(5B)-H(5B)   | 0.9500   |
| C(14A)-C(15A) | 1.517(3) | C(6B)-C(7B)   | 1.525(3) |
| C(14A)-H(14A) | 0.9900   | C(7B)-C(8B)   | 1.533(3) |
| C(14A)-H(14B) | 0.9900   | C(7B)-C(11B)  | 1.538(3) |
| C(15A)-C(16A) | 1.323(3) | C(7B)-C(10B)  | 1.575(3) |
| C(15A)-H(15A) | 0.9500   | C(8B)-C(9B)   | 1.524(3) |
| C(16A)-C(17A) | 1.467(4) | C(8B)-H(8B1)  | 0.9900   |
| C(16A)-H(16A) | 0.9500   | C(8B)-H(8B2)  | 0.9900   |
| C(17A)-C(18A) | 1.398(3) | C(9B)-H(9B1)  | 0.9900   |
| C(17A)-C(22A) | 1.396(3) | C(9B)-H(9B2)  | 0.9900   |
| C(18A)-C(19A) | 1.381(3) | C(10B)-H(10B) | 1.0000   |
| C(18A)-H(18A) | 0.9500   | C(11B)-C(12B) | 1.505(3) |
| C(19A)-C(20A) | 1.391(4) | C(11B)-H(11C) | 0.9900   |

|                     |            |                      |            |
|---------------------|------------|----------------------|------------|
| C(11B)-H(11D)       | 0.9900     | C(3A)-C(4A)-C(5A)    | 118.3(2)   |
| C(12B)-C(13B)       | 1.533(3)   | C(3A)-C(4A)-H(4A)    | 120.9      |
| C(12B)-H(12C)       | 0.9900     | C(5A)-C(4A)-H(4A)    | 120.9      |
| C(12B)-H(12D)       | 0.9900     | C(6A)-C(5A)-C(4A)    | 120.2(2)   |
| C(13B)-H(13C)       | 0.9900     | C(6A)-C(5A)-H(5A)    | 119.9      |
| C(13B)-H(13D)       | 0.9900     | C(4A)-C(5A)-H(5A)    | 119.9      |
| C(14B)-C(15B)       | 1.521(3)   | C(5A)-C(6A)-C(1A)    | 119.9(2)   |
| C(14B)-H(14C)       | 0.9900     | C(5A)-C(6A)-C(7A)    | 131.1(2)   |
| C(14B)-H(14D)       | 0.9900     | C(1A)-C(6A)-C(7A)    | 109.0(2)   |
| C(15B)-C(16B)       | 1.321(3)   | C(6A)-C(7A)-C(8A)    | 112.8(2)   |
| C(15B)-H(15B)       | 0.9500     | C(6A)-C(7A)-C(11A)   | 112.4(2)   |
| C(16B)-C(17B)       | 1.473(4)   | C(8A)-C(7A)-C(11A)   | 114.7(2)   |
| C(16B)-H(16B)       | 0.9500     | C(6A)-C(7A)-C(10A)   | 101.64(19) |
| C(17B)-C(22B)       | 1.388(3)   | C(8A)-C(7A)-C(10A)   | 104.99(19) |
| C(17B)-C(18B)       | 1.402(3)   | C(11A)-C(7A)-C(10A)  | 109.2(2)   |
| C(18B)-C(19B)       | 1.388(3)   | C(7A)-C(8A)-C(9A)    | 104.16(19) |
| C(18B)-H(18B)       | 0.9500     | C(7A)-C(8A)-H(8A1)   | 110.9      |
| C(19B)-C(20B)       | 1.374(4)   | C(9A)-C(8A)-H(8A1)   | 110.9      |
| C(19B)-H(19B)       | 0.9500     | C(7A)-C(8A)-H(8A2)   | 110.9      |
| C(20B)-C(21B)       | 1.389(4)   | C(9A)-C(8A)-H(8A2)   | 110.9      |
| C(20B)-H(20B)       | 0.9500     | H(8A1)-C(8A)-H(8A2)  | 108.9      |
| C(21B)-C(22B)       | 1.381(4)   | N(2A)-C(9A)-C(8A)    | 101.73(19) |
| C(21B)-H(21B)       | 0.9500     | N(2A)-C(9A)-H(9A1)   | 111.4      |
| C(22B)-H(22B)       | 0.9500     | C(8A)-C(9A)-H(9A1)   | 111.4      |
| C(24B)-C(26B)       | 1.502(3)   | N(2A)-C(9A)-H(9A2)   | 111.4      |
| C(24B)-C(27B)       | 1.516(3)   | C(8A)-C(9A)-H(9A2)   | 111.4      |
| C(24B)-C(25B)       | 1.525(3)   | H(9A1)-C(9A)-H(9A2)  | 109.3      |
| C(25B)-H(25D)       | 0.9800     | N(1A)-C(10A)-N(2A)   | 115.61(19) |
| C(25B)-H(25E)       | 0.9800     | N(1A)-C(10A)-C(7A)   | 104.97(18) |
| C(25B)-H(25F)       | 0.9800     | N(2A)-C(10A)-C(7A)   | 104.02(19) |
| C(26B)-H(26D)       | 0.9800     | N(1A)-C(10A)-H(10A)  | 110.6      |
| C(26B)-H(26E)       | 0.9800     | N(2A)-C(10A)-H(10A)  | 110.6      |
| C(26B)-H(26F)       | 0.9800     | C(7A)-C(10A)-H(10A)  | 110.6      |
| C(27B)-H(27D)       | 0.9800     | C(12A)-C(11A)-C(7A)  | 116.4(2)   |
| C(27B)-H(27E)       | 0.9800     | C(12A)-C(11A)-H(11A) | 108.2      |
| C(27B)-H(27F)       | 0.9800     | C(7A)-C(11A)-H(11A)  | 108.2      |
|                     |            | C(12A)-C(11A)-H(11B) | 108.2      |
| C(23A)-O(2A)-C(24A) | 122.26(19) | C(7A)-C(11A)-H(11B)  | 108.2      |
| C(13A)-O(3A)-H(3A)  | 109.5      | H(11A)-C(11A)-H(11B) | 107.3      |
| C(1A)-N(1A)-C(10A)  | 109.57(19) | C(11A)-C(12A)-C(13A) | 110.8(2)   |
| C(1A)-N(1A)-C(14A)  | 123.6(2)   | C(11A)-C(12A)-H(12A) | 109.5      |
| C(10A)-N(1A)-C(14A) | 122.91(19) | C(13A)-C(12A)-H(12A) | 109.5      |
| C(23A)-N(2A)-C(10A) | 124.2(2)   | C(11A)-C(12A)-H(12B) | 109.5      |
| C(23A)-N(2A)-C(9A)  | 121.6(2)   | C(13A)-C(12A)-H(12B) | 109.5      |
| C(10A)-N(2A)-C(9A)  | 111.96(18) | H(12A)-C(12A)-H(12B) | 108.1      |
| C(2A)-C(1A)-N(1A)   | 127.6(2)   | O(3A)-C(13A)-C(12A)  | 109.7(2)   |
| C(2A)-C(1A)-C(6A)   | 121.8(2)   | O(3A)-C(13A)-H(13A)  | 109.7      |
| N(1A)-C(1A)-C(6A)   | 110.6(2)   | C(12A)-C(13A)-H(13A) | 109.7      |
| C(1A)-C(2A)-C(3A)   | 116.4(2)   | O(3A)-C(13A)-H(13B)  | 109.7      |
| C(1A)-C(2A)-H(2A)   | 121.8      | C(12A)-C(13A)-H(13B) | 109.7      |
| C(3A)-C(2A)-H(2A)   | 121.8      | H(13A)-C(13A)-H(13B) | 108.2      |
| C(4A)-C(3A)-C(2A)   | 123.4(2)   | N(1A)-C(14A)-C(15A)  | 114.6(2)   |
| C(4A)-C(3A)-Br(1)   | 118.72(18) | N(1A)-C(14A)-H(14A)  | 108.6      |
| C(2A)-C(3A)-Br(1)   | 117.85(18) | C(15A)-C(14A)-H(14A) | 108.6      |

|                      |            |                      |            |
|----------------------|------------|----------------------|------------|
| N(1A)-C(14A)-H(14B)  | 108.6      | C(23B)-O(2B)-C(24B)  | 121.67(19) |
| C(15A)-C(14A)-H(14B) | 108.6      | C(13B)-O(3B)-H(3B)   | 109.5      |
| H(14A)-C(14A)-H(14B) | 107.6      | C(1B)-N(1B)-C(14B)   | 121.5(2)   |
| C(16A)-C(15A)-C(14A) | 123.9(3)   | C(1B)-N(1B)-C(10B)   | 110.43(19) |
| C(16A)-C(15A)-H(15A) | 118.0      | C(14B)-N(1B)-C(10B)  | 122.60(18) |
| C(14A)-C(15A)-H(15A) | 118.0      | C(23B)-N(2B)-C(9B)   | 122.0(2)   |
| C(15A)-C(16A)-C(17A) | 127.2(3)   | C(23B)-N(2B)-C(10B)  | 126.0(2)   |
| C(15A)-C(16A)-H(16A) | 116.4      | C(9B)-N(2B)-C(10B)   | 111.62(18) |
| C(17A)-C(16A)-H(16A) | 116.4      | C(2B)-C(1B)-N(1B)    | 128.5(2)   |
| C(18A)-C(17A)-C(22A) | 117.5(2)   | C(2B)-C(1B)-C(6B)    | 121.3(2)   |
| C(18A)-C(17A)-C(16A) | 123.5(2)   | N(1B)-C(1B)-C(6B)    | 110.2(2)   |
| C(22A)-C(17A)-C(16A) | 119.0(2)   | C(1B)-C(2B)-C(3B)    | 116.4(2)   |
| C(19A)-C(18A)-C(17A) | 121.5(2)   | C(1B)-C(2B)-H(2B)    | 121.8      |
| C(19A)-C(18A)-H(18A) | 119.2      | C(3B)-C(2B)-H(2B)    | 121.8      |
| C(17A)-C(18A)-H(18A) | 119.2      | C(4B)-C(3B)-C(2B)    | 124.1(2)   |
| C(18A)-C(19A)-C(20A) | 119.4(3)   | C(4B)-C(3B)-Br(2)    | 118.21(18) |
| C(18A)-C(19A)-H(19A) | 120.3      | C(2B)-C(3B)-Br(2)    | 117.67(18) |
| C(20A)-C(19A)-H(19A) | 120.3      | C(3B)-C(4B)-C(5B)    | 117.6(2)   |
| C(21A)-C(20A)-C(19A) | 119.7(3)   | C(3B)-C(4B)-H(4B)    | 121.2      |
| C(21A)-C(20A)-H(20A) | 120.2      | C(5B)-C(4B)-H(4B)    | 121.2      |
| C(19A)-C(20A)-H(20A) | 120.2      | C(6B)-C(5B)-C(4B)    | 120.3(2)   |
| C(22A)-C(21A)-C(20A) | 120.4(3)   | C(6B)-C(5B)-H(5B)    | 119.8      |
| C(22A)-C(21A)-H(21A) | 119.8      | C(4B)-C(5B)-H(5B)    | 119.8      |
| C(20A)-C(21A)-H(21A) | 119.8      | C(5B)-C(6B)-C(1B)    | 120.1(2)   |
| C(21A)-C(22A)-C(17A) | 121.5(3)   | C(5B)-C(6B)-C(7B)    | 130.1(2)   |
| C(21A)-C(22A)-H(22A) | 119.2      | C(1B)-C(6B)-C(7B)    | 109.8(2)   |
| C(17A)-C(22A)-H(22A) | 119.2      | C(6B)-C(7B)-C(8B)    | 111.5(2)   |
| O(1A)-C(23A)-O(2A)   | 125.0(2)   | C(6B)-C(7B)-C(11B)   | 112.1(2)   |
| O(1A)-C(23A)-N(2A)   | 125.2(2)   | C(8B)-C(7B)-C(11B)   | 111.46(19) |
| O(2A)-C(23A)-N(2A)   | 109.8(2)   | C(6B)-C(7B)-C(10B)   | 101.80(19) |
| O(2A)-C(24A)-C(25A)  | 109.8(2)   | C(8B)-C(7B)-C(10B)   | 104.52(19) |
| O(2A)-C(24A)-C(26A)  | 109.6(2)   | C(11B)-C(7B)-C(10B)  | 114.8(2)   |
| C(25A)-C(24A)-C(26A) | 112.0(2)   | C(9B)-C(8B)-C(7B)    | 104.4(2)   |
| O(2A)-C(24A)-C(27A)  | 101.76(19) | C(9B)-C(8B)-H(8B1)   | 110.9      |
| C(25A)-C(24A)-C(27A) | 111.8(2)   | C(7B)-C(8B)-H(8B1)   | 110.9      |
| C(26A)-C(24A)-C(27A) | 111.4(3)   | C(9B)-C(8B)-H(8B2)   | 110.9      |
| C(24A)-C(25A)-H(25A) | 109.5      | C(7B)-C(8B)-H(8B2)   | 110.9      |
| C(24A)-C(25A)-H(25B) | 109.5      | H(8B1)-C(8B)-H(8B2)  | 108.9      |
| H(25A)-C(25A)-H(25B) | 109.5      | N(2B)-C(9B)-C(8B)    | 102.1(2)   |
| C(24A)-C(25A)-H(25C) | 109.5      | N(2B)-C(9B)-H(9B1)   | 111.3      |
| H(25A)-C(25A)-H(25C) | 109.5      | C(8B)-C(9B)-H(9B1)   | 111.3      |
| H(25B)-C(25A)-H(25C) | 109.5      | N(2B)-C(9B)-H(9B2)   | 111.3      |
| C(24A)-C(26A)-H(26A) | 109.5      | C(8B)-C(9B)-H(9B2)   | 111.3      |
| C(24A)-C(26A)-H(26B) | 109.5      | H(9B1)-C(9B)-H(9B2)  | 109.2      |
| H(26A)-C(26A)-H(26B) | 109.5      | N(1B)-C(10B)-N(2B)   | 113.86(19) |
| C(24A)-C(26A)-H(26C) | 109.5      | N(1B)-C(10B)-C(7B)   | 104.60(18) |
| H(26A)-C(26A)-H(26C) | 109.5      | N(2B)-C(10B)-C(7B)   | 103.70(19) |
| H(26B)-C(26A)-H(26C) | 109.5      | N(1B)-C(10B)-H(10B)  | 111.4      |
| C(24A)-C(27A)-H(27A) | 109.5      | N(2B)-C(10B)-H(10B)  | 111.4      |
| C(24A)-C(27A)-H(27B) | 109.5      | C(7B)-C(10B)-H(10B)  | 111.4      |
| H(27A)-C(27A)-H(27B) | 109.5      | C(12B)-C(11B)-C(7B)  | 114.7(2)   |
| C(24A)-C(27A)-H(27C) | 109.5      | C(12B)-C(11B)-H(11C) | 108.6      |
| H(27A)-C(27A)-H(27C) | 109.5      | C(7B)-C(11B)-H(11C)  | 108.6      |
| H(27B)-C(27A)-H(27C) | 109.5      | C(12B)-C(11B)-H(11D) | 108.6      |

|                      |          |                      |            |
|----------------------|----------|----------------------|------------|
| C(7B)-C(11B)-H(11D)  | 108.6    | C(19B)-C(20B)-H(20B) | 120.3      |
| H(11C)-C(11B)-H(11D) | 107.6    | C(21B)-C(20B)-H(20B) | 120.3      |
| C(11B)-C(12B)-C(13B) | 111.4(2) | C(22B)-C(21B)-C(20B) | 119.8(3)   |
| C(11B)-C(12B)-H(12C) | 109.3    | C(22B)-C(21B)-H(21B) | 120.1      |
| C(13B)-C(12B)-H(12C) | 109.3    | C(20B)-C(21B)-H(21B) | 120.1      |
| C(11B)-C(12B)-H(12D) | 109.3    | C(21B)-C(22B)-C(17B) | 121.9(3)   |
| C(13B)-C(12B)-H(12D) | 109.3    | C(21B)-C(22B)-H(22B) | 119.1      |
| H(12C)-C(12B)-H(12D) | 108.0    | C(17B)-C(22B)-H(22B) | 119.1      |
| O(3B)-C(13B)-C(12B)  | 110.9(2) | O(1B)-C(23B)-O(2B)   | 124.4(2)   |
| O(3B)-C(13B)-H(13C)  | 109.5    | O(1B)-C(23B)-N(2B)   | 124.5(2)   |
| C(12B)-C(13B)-H(13C) | 109.5    | O(2B)-C(23B)-N(2B)   | 111.1(2)   |
| O(3B)-C(13B)-H(13D)  | 109.5    | O(2B)-C(24B)-C(26B)  | 110.5(2)   |
| C(12B)-C(13B)-H(13D) | 109.5    | O(2B)-C(24B)-C(27B)  | 101.47(19) |
| H(13C)-C(13B)-H(13D) | 108.1    | C(26B)-C(24B)-C(27B) | 111.4(2)   |
| N(1B)-C(14B)-C(15B)  | 114.8(2) | O(2B)-C(24B)-C(25B)  | 110.5(2)   |
| N(1B)-C(14B)-H(14C)  | 108.6    | C(26B)-C(24B)-C(25B) | 112.1(2)   |
| C(15B)-C(14B)-H(14C) | 108.6    | C(27B)-C(24B)-C(25B) | 110.4(2)   |
| N(1B)-C(14B)-H(14D)  | 108.6    | C(24B)-C(25B)-H(25D) | 109.5      |
| C(15B)-C(14B)-H(14D) | 108.6    | C(24B)-C(25B)-H(25E) | 109.5      |
| H(14C)-C(14B)-H(14D) | 107.5    | H(25D)-C(25B)-H(25E) | 109.5      |
| C(16B)-C(15B)-C(14B) | 123.9(2) | C(24B)-C(25B)-H(25F) | 109.5      |
| C(16B)-C(15B)-H(15B) | 118.0    | H(25D)-C(25B)-H(25F) | 109.5      |
| C(14B)-C(15B)-H(15B) | 118.0    | H(25E)-C(25B)-H(25F) | 109.5      |
| C(15B)-C(16B)-C(17B) | 127.5(3) | C(24B)-C(26B)-H(26D) | 109.5      |
| C(15B)-C(16B)-H(16B) | 116.3    | C(24B)-C(26B)-H(26E) | 109.5      |
| C(17B)-C(16B)-H(16B) | 116.3    | H(26D)-C(26B)-H(26E) | 109.5      |
| C(22B)-C(17B)-C(18B) | 117.6(2) | C(24B)-C(26B)-H(26F) | 109.5      |
| C(22B)-C(17B)-C(16B) | 118.9(2) | H(26D)-C(26B)-H(26F) | 109.5      |
| C(18B)-C(17B)-C(16B) | 123.5(2) | H(26E)-C(26B)-H(26F) | 109.5      |
| C(19B)-C(18B)-C(17B) | 120.4(2) | C(24B)-C(27B)-H(27D) | 109.5      |
| C(19B)-C(18B)-H(18B) | 119.8    | C(24B)-C(27B)-H(27E) | 109.5      |
| C(17B)-C(18B)-H(18B) | 119.8    | H(27D)-C(27B)-H(27E) | 109.5      |
| C(20B)-C(19B)-C(18B) | 120.9(3) | C(24B)-C(27B)-H(27F) | 109.5      |
| C(20B)-C(19B)-H(19B) | 119.5    | H(27D)-C(27B)-H(27F) | 109.5      |
| C(18B)-C(19B)-H(19B) | 119.5    | H(27E)-C(27B)-H(27F) | 109.5      |
| C(19B)-C(20B)-C(21B) | 119.3(3) |                      |            |

---



**Table 7. Anisotropic displacement parameters ( $\text{\AA}^2 \times 10^4$ ) for JFA01 (CCDC 197024). The anisotropic displacement factor exponent takes the form:  $-2\pi^2 [ h^2 a^{*2} U^{11} + \dots + 2 h k a^* b^* U^{12} ]$**

|        | $U^{11}$ | $U^{22}$ | $U^{33}$ | $U^{23}$ | $U^{13}$ | $U^{12}$ |
|--------|----------|----------|----------|----------|----------|----------|
| Br(1)  | 168(1)   | 227(1)   | 246(1)   | 57(2)    | 36(1)    | -14(2)   |
| O(1A)  | 318(11)  | 258(11)  | 131(10)  | 24(8)    | 46(8)    | 36(8)    |
| O(2A)  | 210(10)  | 238(11)  | 159(10)  | -13(8)   | 45(8)    | 79(8)    |
| O(3A)  | 258(11)  | 334(13)  | 326(12)  | 73(9)    | -82(9)   | -69(9)   |
| N(1A)  | 170(11)  | 142(11)  | 181(12)  | -19(9)   | 51(10)   | -32(9)   |
| N(2A)  | 168(11)  | 182(11)  | 135(11)  | 9(9)     | 8(9)     | 19(9)    |
| C(1A)  | 194(13)  | 174(14)  | 84(13)   | -3(10)   | 12(11)   | 44(11)   |
| C(2A)  | 199(12)  | 159(16)  | 123(12)  | 21(10)   | 18(10)   | 2(10)    |
| C(3A)  | 134(13)  | 176(13)  | 151(14)  | 52(11)   | 28(10)   | -17(10)  |
| C(4A)  | 148(13)  | 237(14)  | 111(13)  | 39(11)   | -3(10)   | 56(11)   |
| C(5A)  | 194(14)  | 152(13)  | 135(14)  | 5(11)    | -20(11)  | 38(11)   |
| C(6A)  | 142(13)  | 211(14)  | 90(13)   | -2(11)   | -1(10)   | -1(11)   |
| C(7A)  | 162(13)  | 195(14)  | 134(13)  | -27(11)  | 17(11)   | -12(11)  |
| C(8A)  | 208(14)  | 151(14)  | 184(14)  | -21(11)  | 54(11)   | -15(11)  |
| C(9A)  | 183(14)  | 150(13)  | 185(14)  | 8(11)    | 34(11)   | -7(11)   |
| C(10A) | 149(13)  | 190(14)  | 109(13)  | -24(10)  | -3(10)   | 14(11)   |
| C(11A) | 142(13)  | 215(15)  | 173(14)  | -7(11)   | 18(11)   | 16(11)   |
| C(12A) | 232(15)  | 256(16)  | 247(16)  | -36(12)  | -21(12)  | 12(12)   |
| C(13A) | 279(16)  | 295(17)  | 181(15)  | -22(12)  | -49(12)  | -2(13)   |
| C(14A) | 202(14)  | 163(14)  | 243(15)  | -32(12)  | 46(12)   | 6(11)    |
| C(15A) | 209(14)  | 236(16)  | 192(14)  | 22(12)   | 39(11)   | 41(12)   |
| C(16A) | 211(15)  | 195(15)  | 208(15)  | -13(11)  | 70(12)   | 13(11)   |
| C(17A) | 132(13)  | 249(15)  | 199(15)  | -47(12)  | 32(11)   | 34(11)   |
| C(18A) | 188(14)  | 184(14)  | 260(16)  | -35(12)  | 60(12)   | 9(11)    |
| C(19A) | 191(14)  | 232(15)  | 226(15)  | 9(12)    | 29(12)   | 11(12)   |
| C(20A) | 250(16)  | 329(18)  | 209(16)  | -10(13)  | -55(13)  | -23(13)  |
| C(21A) | 228(15)  | 260(16)  | 306(17)  | -52(13)  | 17(13)   | -65(12)  |
| C(22A) | 234(15)  | 177(14)  | 272(16)  | 17(12)   | 84(12)   | 14(12)   |
| C(23A) | 146(13)  | 191(15)  | 194(15)  | -20(11)  | 25(11)   | -28(11)  |
| C(24A) | 278(14)  | 220(20)  | 224(13)  | -16(13)  | 130(11)  | 78(13)   |
| C(25A) | 450(20)  | 311(19)  | 780(30)  | -43(18)  | 390(20)  | 15(16)   |
| C(26A) | 522(19)  | 380(20)  | 311(17)  | -136(14) | 13(15)   | 97(15)   |
| C(27A) | 490(20)  | 385(19)  | 354(19)  | 4(15)    | 159(16)  | 246(16)  |
| Br(2)  | 191(1)   | 237(1)   | 232(1)   | -8(2)    | 51(1)    | 40(2)    |
| O(1B)  | 242(10)  | 259(11)  | 126(10)  | -9(8)    | 11(8)    | -36(8)   |
| O(2B)  | 198(10)  | 243(10)  | 140(9)   | 7(8)     | 45(8)    | -73(8)   |
| O(3B)  | 261(11)  | 318(12)  | 305(12)  | -85(9)   | -108(9)  | 109(9)   |
| N(1B)  | 169(11)  | 129(11)  | 168(12)  | 26(9)    | 27(9)    | -1(9)    |
| N(2B)  | 146(11)  | 184(12)  | 107(11)  | -12(9)   | 1(9)     | -33(9)   |
| C(1B)  | 146(13)  | 195(14)  | 110(13)  | -31(10)  | -7(10)   | -22(11)  |
| C(2B)  | 191(13)  | 164(13)  | 148(13)  | -14(10)  | 7(11)    | -16(11)  |
| C(3B)  | 114(13)  | 229(15)  | 145(14)  | -49(11)  | 25(10)   | 43(11)   |
| C(4B)  | 172(13)  | 202(15)  | 168(14)  | 2(11)    | 37(11)   | -30(11)  |
| C(5B)  | 208(14)  | 156(14)  | 166(14)  | -2(11)   | 11(11)   | -24(11)  |
| C(6B)  | 164(13)  | 179(14)  | 97(13)   | 14(10)   | -14(10)  | -9(10)   |
| C(7B)  | 170(13)  | 169(14)  | 124(13)  | 37(10)   | 11(11)   | -4(10)   |

|        |         |         |         |         |         |          |
|--------|---------|---------|---------|---------|---------|----------|
| C(8B)  | 189(14) | 197(14) | 160(14) | -2(11)  | 45(11)  | 3(11)    |
| C(9B)  | 174(13) | 192(14) | 163(14) | 0(11)   | 16(11)  | -34(11)  |
| C(10B) | 131(13) | 175(14) | 160(14) | -10(11) | 19(11)  | 3(11)    |
| C(11B) | 207(14) | 204(15) | 158(14) | -2(11)  | -4(11)  | -1(12)   |
| C(12B) | 185(14) | 259(15) | 166(14) | -21(11) | 11(11)  | 30(12)   |
| C(13B) | 269(16) | 305(17) | 174(15) | -39(12) | -35(12) | 38(13)   |
| C(14B) | 189(12) | 182(17) | 201(13) | 5(11)   | 13(10)  | -50(11)  |
| C(15B) | 237(14) | 205(16) | 200(14) | 3(10)   | 56(11)  | -31(11)  |
| C(16B) | 166(14) | 218(15) | 205(15) | -28(12) | 46(11)  | -54(12)  |
| C(17B) | 157(14) | 194(15) | 234(15) | 18(11)  | 73(11)  | -46(11)  |
| C(18B) | 168(14) | 203(15) | 221(15) | 25(12)  | 66(11)  | -5(11)   |
| C(19B) | 216(15) | 223(15) | 270(16) | -31(12) | 64(12)  | -42(12)  |
| C(20B) | 273(17) | 327(18) | 251(17) | 61(13)  | -42(13) | 35(14)   |
| C(21B) | 300(17) | 234(16) | 302(17) | 0(13)   | 20(14)  | 48(13)   |
| C(22B) | 242(15) | 224(16) | 231(15) | -41(12) | 14(12)  | -35(12)  |
| C(23B) | 149(13) | 167(14) | 188(15) | 49(11)  | 4(11)   | 26(11)   |
| C(24B) | 192(13) | 256(15) | 188(14) | 22(12)  | 46(11)  | -50(12)  |
| C(25B) | 292(16) | 256(16) | 259(16) | 25(12)  | 110(13) | -48(13)  |
| C(26B) | 313(14) | 256(19) | 308(15) | 102(14) | 128(12) | 26(14)   |
| C(27B) | 339(15) | 297(19) | 292(14) | -4(14)  | 125(12) | -160(14) |

---

**Table 8. Hydrogen coordinates ( $\times 10^4$ ) and isotropic displacement parameters ( $\text{\AA}^2 \times 10^{-3}$ ) for JFA01 (CCDC 197024).**

|        | <i>x</i> | <i>y</i> | <i>z</i> | $U^{iso}$ |
|--------|----------|----------|----------|-----------|
| H(3A)  | 14390    | 10496    | 8988     | 47        |
| H(2A)  | 7051     | 7713     | 6895     | 19        |
| H(4A)  | 5442     | 9811     | 7903     | 20        |
| H(5A)  | 7659     | 10587    | 7722     | 20        |
| H(8A1) | 11095    | 11056    | 6625     | 21        |
| H(8A2) | 9331     | 11159    | 6751     | 21        |
| H(9A1) | 8486     | 10332    | 5717     | 21        |
| H(9A2) | 9916     | 10823    | 5433     | 21        |
| H(10A) | 11820    | 9078     | 6689     | 18        |
| H(11A) | 11441    | 9426     | 8014     | 21        |
| H(11B) | 12409    | 10112    | 7617     | 21        |
| H(12A) | 10072    | 10568    | 8479     | 30        |
| H(12B) | 11099    | 11246    | 8099     | 30        |
| H(13A) | 12031    | 11032    | 9378     | 31        |
| H(13B) | 12337    | 10036    | 9207     | 31        |
| H(14A) | 9535     | 7196     | 6624     | 24        |
| H(14B) | 10932    | 7553     | 6237     | 24        |
| H(15A) | 8850     | 8106     | 5252     | 25        |
| H(16A) | 8081     | 6458     | 5655     | 24        |
| H(18A) | 7720     | 7937     | 4109     | 25        |
| H(19A) | 6237     | 7716     | 2983     | 26        |
| H(20A) | 4891     | 6416     | 2764     | 32        |
| H(21A) | 4968     | 5383     | 3698     | 32        |
| H(22A) | 6376     | 5626     | 4825     | 27        |
| H(25A) | 13584    | 9311     | 4372     | 73        |
| H(25B) | 14786    | 8540     | 4361     | 73        |
| H(25C) | 14747    | 9100     | 5093     | 73        |
| H(26A) | 11243    | 7447     | 4469     | 61        |
| H(26B) | 12510    | 7601     | 3930     | 61        |
| H(26C) | 11304    | 8345     | 4042     | 61        |
| H(27A) | 14380    | 7775     | 5816     | 60        |
| H(27B) | 14406    | 7186     | 5100     | 60        |
| H(27C) | 12979    | 7146     | 5557     | 60        |
| H(3B)  | 527      | 5394     | 5908     | 46        |
| H(2B)  | 7688     | 2841     | 8085     | 20        |
| H(4B)  | 9624     | 4874     | 7127     | 21        |
| H(5B)  | 7493     | 5737     | 7296     | 21        |
| H(8B1) | 6106     | 6330     | 8397     | 22        |
| H(8B2) | 4327     | 6367     | 8507     | 22        |
| H(9B1) | 6660     | 5349     | 9347     | 21        |
| H(9B2) | 5393     | 5941     | 9669     | 21        |
| H(10B) | 3093     | 4431     | 8277     | 19        |
| H(11C) | 2917     | 5771     | 7424     | 23        |
| H(11D) | 4388     | 5980     | 7030     | 23        |
| H(12C) | 2749     | 4395     | 6938     | 25        |
| H(12D) | 4361     | 4494     | 6632     | 25        |
| H(13C) | 3330     | 5544     | 5770     | 31        |

|        |       |      |       |    |
|--------|-------|------|-------|----|
| H(13D) | 2323  | 4683 | 5659  | 31 |
| H(14C) | 5137  | 2441 | 8350  | 23 |
| H(14D) | 3838  | 2861 | 8769  | 23 |
| H(15B) | 6040  | 3326 | 9721  | 25 |
| H(16B) | 6631  | 1668 | 9277  | 23 |
| H(18B) | 7242  | 3100 | 10862 | 23 |
| H(19B) | 8857  | 2814 | 11941 | 28 |
| H(20B) | 10175 | 1516 | 12092 | 35 |
| H(21B) | 9962  | 512  | 11126 | 34 |
| H(22B) | 8396  | 805  | 10040 | 28 |
| H(25D) | 1686  | 4480 | 10836 | 39 |
| H(25E) | 315   | 3800 | 10797 | 39 |
| H(25F) | 348   | 4506 | 10160 | 39 |
| H(26D) | 3505  | 2567 | 10286 | 43 |
| H(26E) | 2403  | 2634 | 10914 | 43 |
| H(26F) | 3709  | 3341 | 10870 | 43 |
| H(27D) | 86    | 3321 | 9256  | 45 |
| H(27E) | 218   | 2571 | 9862  | 45 |
| H(27F) | 1383  | 2599 | 9259  | 45 |

---

**Table 9. Selected torsion angles [°] for JFA01 (CCDC 197024)**

---

|                            |           |
|----------------------------|-----------|
| C(6A)-C(7A)-C(11A)-C(12A)  | -68.1(3)  |
| C(7A)-C(11A)-C(12A)-C(13A) | 177.9(2)  |
| C(11A)-C(12A)-C(13A)-O(3A) | 64.7(3)   |
| C(6B)-C(7B)-C(11B)-C(12B)  | 56.7(3)   |
| C(7B)-C(11B)-C(12B)-C(13B) | -170.8(2) |
| C(11B)-C(12B)-C(13B)-O(3B) | -57.3(3)  |

---

**Table 10. Hydrogen bonds for JFA01 (CCDC 197024) [ $\text{\AA}$  and  $^\circ$ ].**

| D-H...A               | d(D-H) | d(H...A) | d(D...A) | $\angle$ (DHA) |
|-----------------------|--------|----------|----------|----------------|
| O(3A)-H(3A)...O(1B)#1 | 0.84   | 1.94     | 2.772(2) | 169.9          |
| O(3B)-H(3B)...O(1A)#2 | 0.84   | 1.94     | 2.769(3) | 170.8          |

Symmetry transformations used to generate equivalent atoms:

#1  $-x+2, y+1/2, -z+2$

#2  $-x+1, y-1/2, -z+1$

## Appendix 2

Table 11. Crystal data  
Figures 10-14

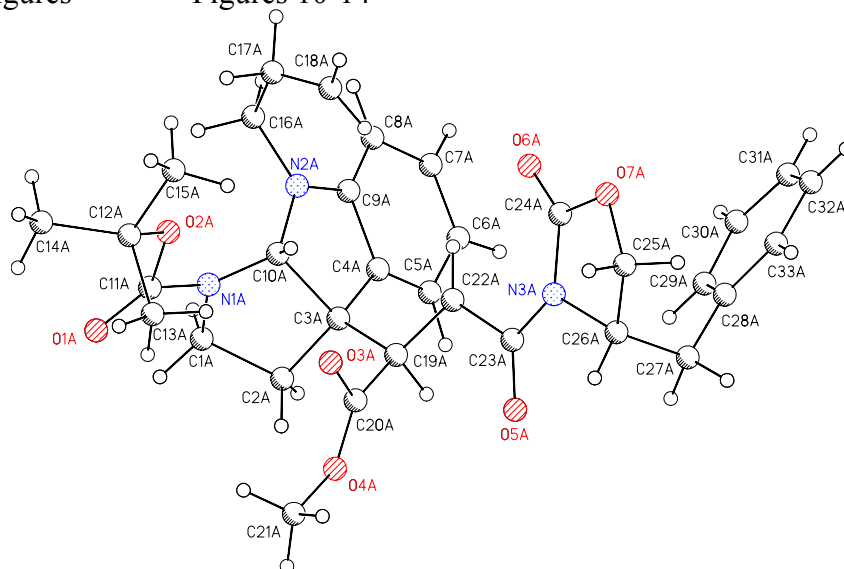

JFA03

**Note:** CCDC 234570 contains the supplementary crystallographic data for this paper. These data can be obtained free of charge via [www.ccdc.cam.ac.uk/data\\_request/cif](http://www.ccdc.cam.ac.uk/data_request/cif), by emailing [data\\_request@ccdc.cam.ac.uk](mailto:data_request@ccdc.cam.ac.uk), or by contacting The Cambridge Crystallographic Data Centre, 12, Union Road, Cambridge CB2 1EZ, UK; fax: +44 1223 336033. Structure factors are available from the authors via e-mail: [xray@caltech.edu](mailto:xray@caltech.edu)

**Table 12. Crystal data and structure refinement for JFA03 (CCDC 234570)**

|                                                                   |                                                               |                       |
|-------------------------------------------------------------------|---------------------------------------------------------------|-----------------------|
| Empirical formula                                                 | C <sub>33</sub> H <sub>39</sub> N <sub>3</sub> O <sub>7</sub> |                       |
| Formula weight                                                    | 589.67                                                        |                       |
| Crystallization solvent                                           | Benzene/Hexane                                                |                       |
| Crystal habit                                                     | Blade                                                         |                       |
| Crystal size                                                      | 0.30 x 0.08 x 0.04 mm <sup>3</sup>                            |                       |
| Crystal color                                                     | Colorless                                                     |                       |
| <b>Data collection</b>                                            |                                                               |                       |
| Preliminary photos                                                | Rotation                                                      |                       |
| Type of diffractometer                                            | Bruker smart 1000                                             |                       |
| Wavelength                                                        | 0.71073 Å MoK $\alpha$                                        |                       |
| Data collection temperature                                       | 100(2) K                                                      |                       |
| $\theta$ range for 1808 reflections used in lattice determination | 2.31 to 29.95°                                                |                       |
| Unit cell dimensions                                              | $a = 8.911(3)$ Å<br>$b = 35.439(11)$ Å<br>$c = 9.979(3)$ Å    | $\beta = 92.251(6)$ ° |
| Volume                                                            | 3149.0(17) Å <sup>3</sup>                                     |                       |
| $Z$                                                               | 4                                                             |                       |
| Crystal system                                                    | Monoclinic                                                    |                       |
| Space group                                                       | $P2_1$                                                        |                       |
| Density (calculated)                                              | 1.244 g/cm <sup>3</sup>                                       |                       |
| $F(000)$                                                          | 1,256                                                         |                       |
| Data collection program                                           | Bruker smart v5.054                                           |                       |
| $\theta$ range for data collection                                | 2.04 to 28.40°                                                |                       |
| Completeness to $\theta = 28.40$ °                                | 89.8 %                                                        |                       |
| Index ranges                                                      | $-11 < h < 11$ , $-31 < k < 45$ , $-12 < l < 13$              |                       |
| Data collection scan type                                         | $\omega$ scans at 3 $\phi$ settings                           |                       |
| Data reduction program                                            | Bruker saint v6.45                                            |                       |
| Reflections collected                                             | 19,204                                                        |                       |
| Independent reflections                                           | 9,952 [ $R_{\text{int}} = 0.2073$ ]                           |                       |
| Absorption coefficient                                            | 0.088 mm <sup>-1</sup>                                        |                       |
| Absorption correction                                             | None                                                          |                       |
| Maximum and minimum transmission                                  | 0.9965 and 0.9742                                             |                       |



**Table 12 (cont.)****Structure solution and refinement**

|                                                          |                                    |
|----------------------------------------------------------|------------------------------------|
| Structure solution program                               | shelxs-97                          |
| Primary solution method                                  | Direct methods                     |
| Secondary solution method                                | Difference Fourier map             |
| Hydrogen placement                                       | Geometric positions                |
| Structure refinement program                             | shelxl -97                         |
| Refinement method                                        | Full matrix least-squares on $F^2$ |
| Data/restraints/parameters                               | 9,952/1/353                        |
| Treatment of hydrogen atoms                              | Riding                             |
| Goodness-of-fit on $F^2$                                 | 1.511                              |
| Final $R$ indices [ $I > 2\sigma(I)$ , 3250 reflections] | $R^1 = 0.1539$ , $wR^2 = 0.2733$   |
| $R$ indices (all data)                                   | $R^1 = 0.3072$ , $wR^2 = 0.2968$   |
| Type of weighting scheme used                            | Sigma                              |
| Weighting scheme used                                    | $w = 1/\sigma^2(F_o^2)$            |
| Maximum shift/error                                      | 0.004                              |
| Average shift/error                                      | 0.000                              |
| Largest difference peak and hole                         | 0.821 and -0.567 e.Å <sup>-3</sup> |

**Special Refinement Details**

The crystals were of low quality and diffracted poorly. As shown in Table 12, the measured intensities represent only 90% of the possible measurements and less than one-third of those were stronger than two times their sigma. Consequently, it was not possible to obtain a satisfactory refinement of the structure. The results of this structure determination are useful only for the verification of relative stereochemistry.

Refinement of  $F^2$  against ALL reflections. The weighted  $R$  factor ( $wR$ ) and goodness of fit ( $S$ ) are based on  $F^2$ , conventional  $R$  factors ( $R$ ) are based on  $F$ , with  $F$  set to zero for negative  $F^2$ . The threshold expression of  $F^2 > 2\sigma(F^2)$  is used only for calculating  $R$  factors(gt) etc. and is not relevant to the choice of reflections for refinement.

All estimated standard deviations (esds) (except the esd in the dihedral angle between two least squares (l.s.) planes) are estimated using the full covariance matrix. The cell esds are taken into account individually in the estimation of esds in distances, angles, and torsion angles; correlations between esds in cell parameters are only used when they are defined by crystal symmetry. An approximate (isotropic) treatment of cell esds is used for estimating esds involving l.s. planes.

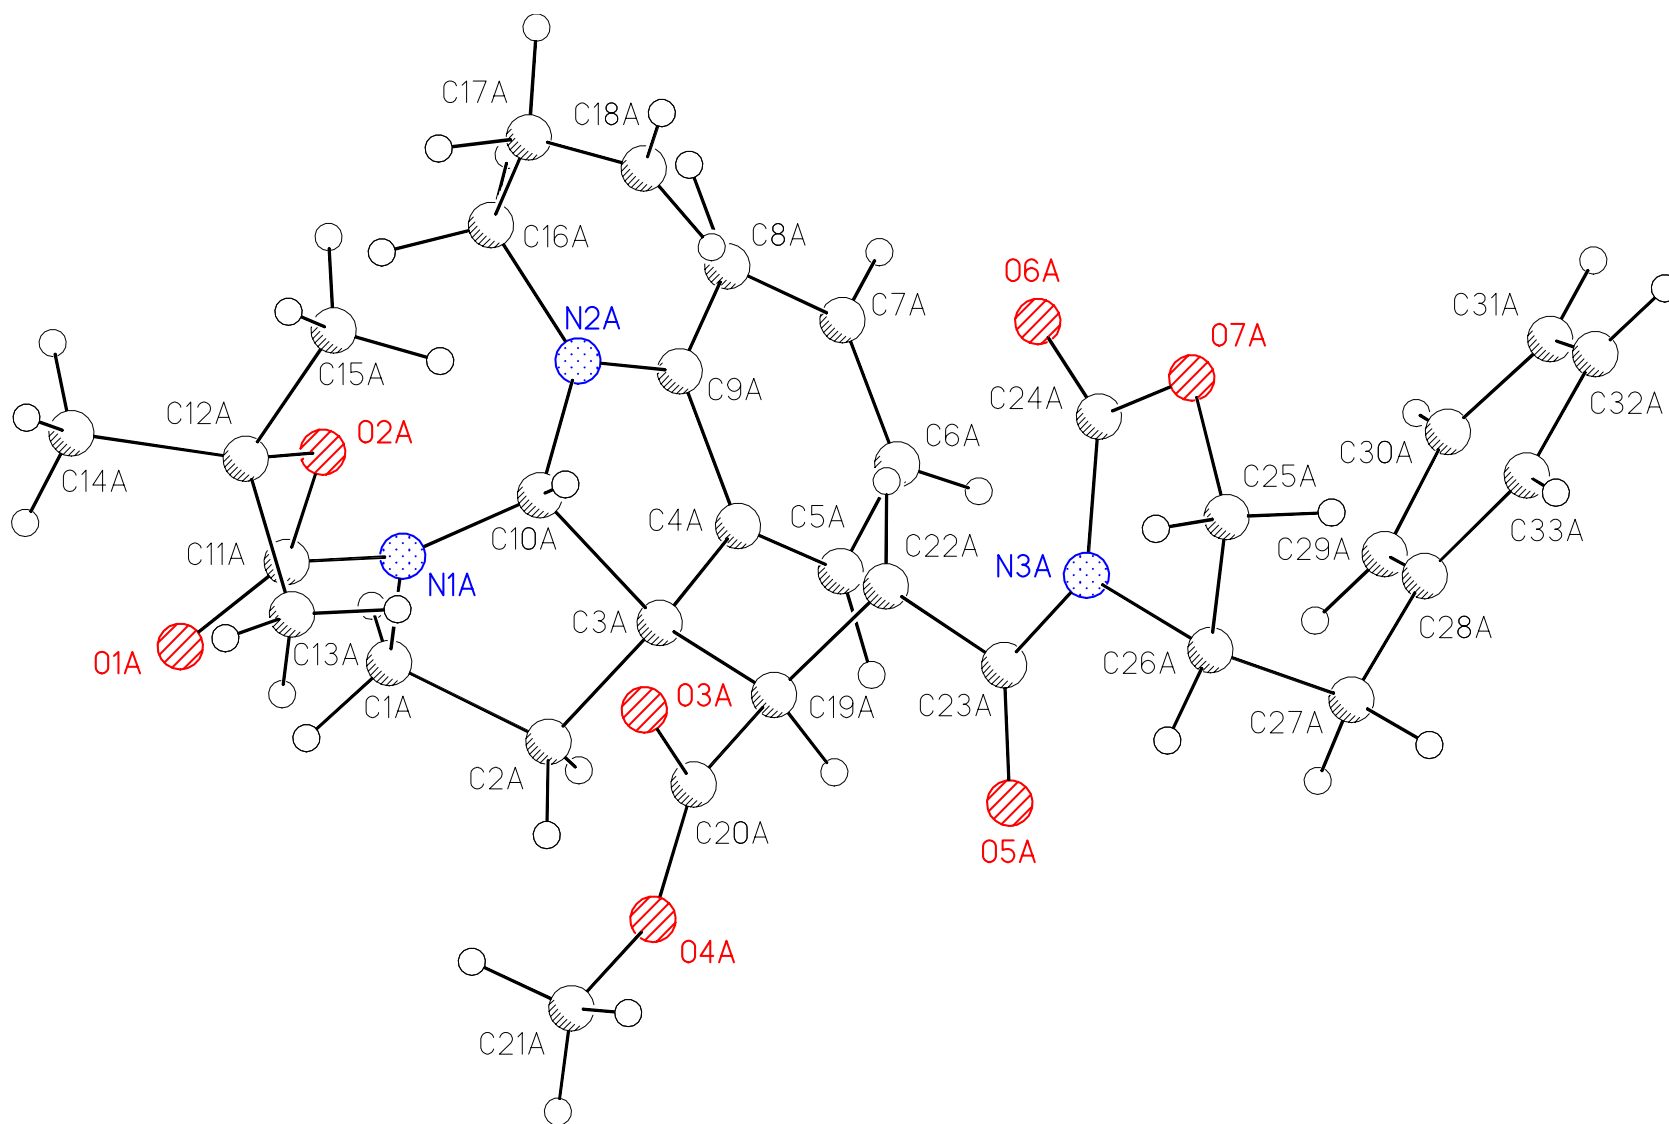

Figure 10. Molecule A of JFA03 with labels.

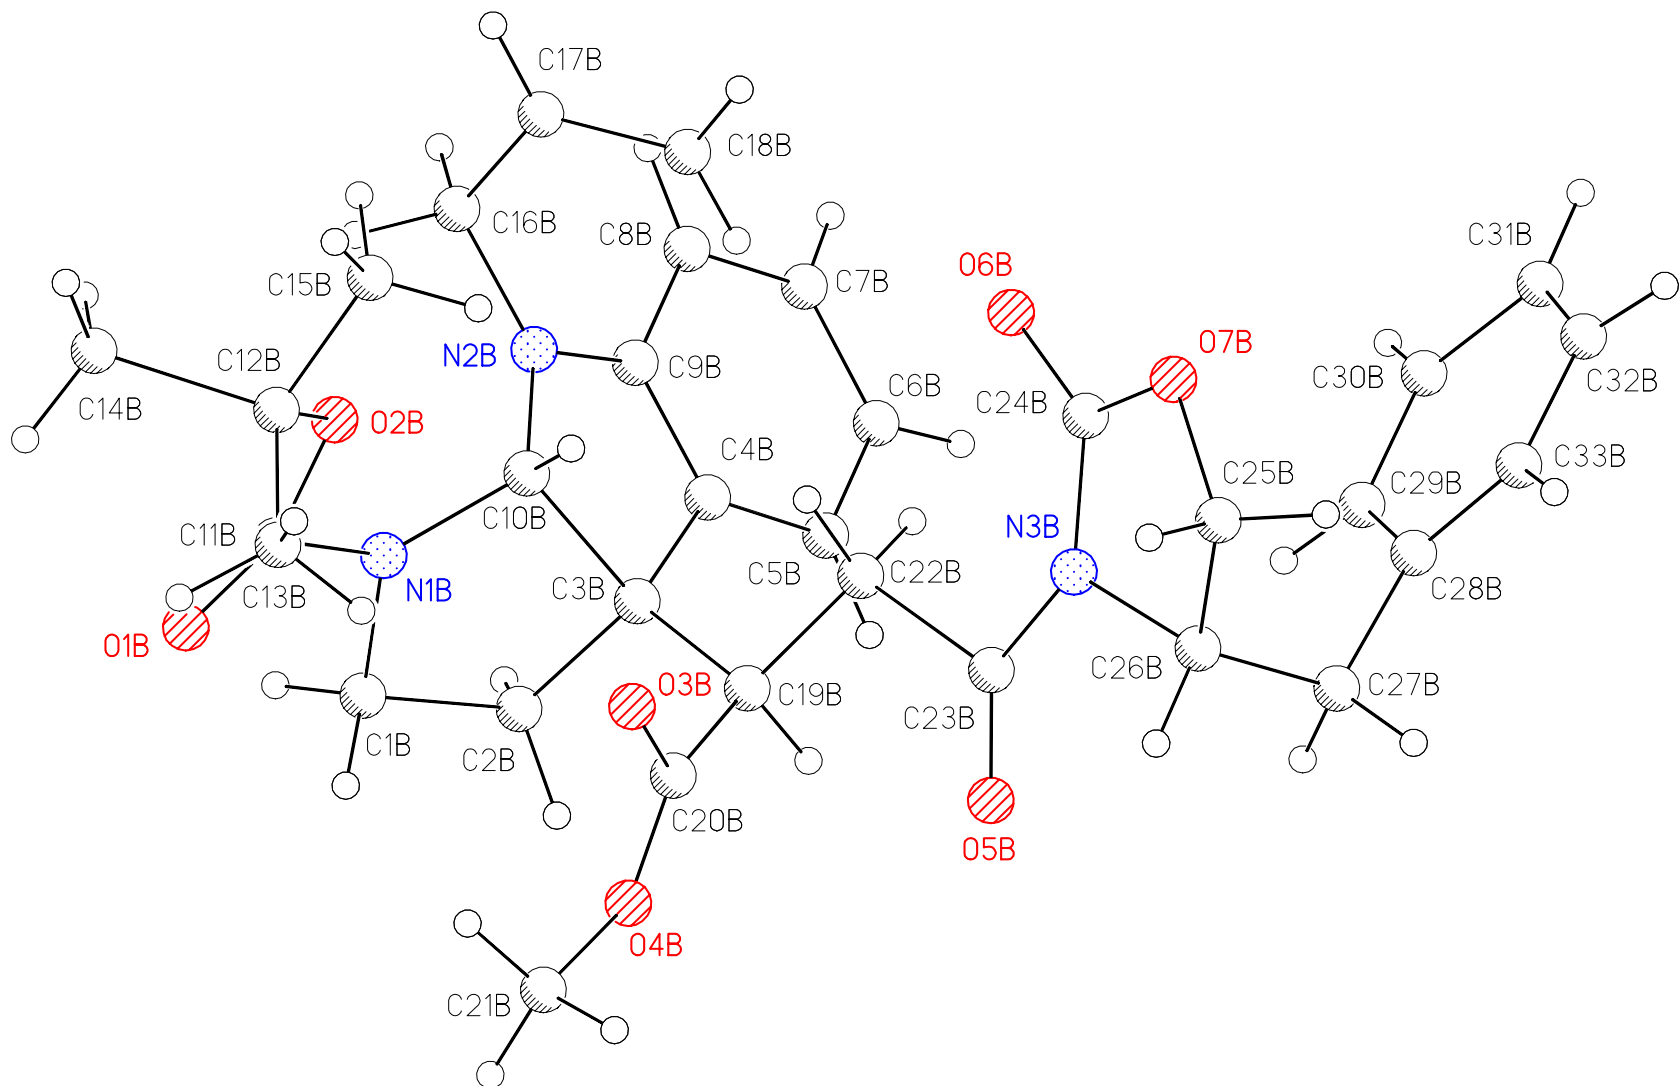

Figure 11. Molecule B of JFA03 with labels.

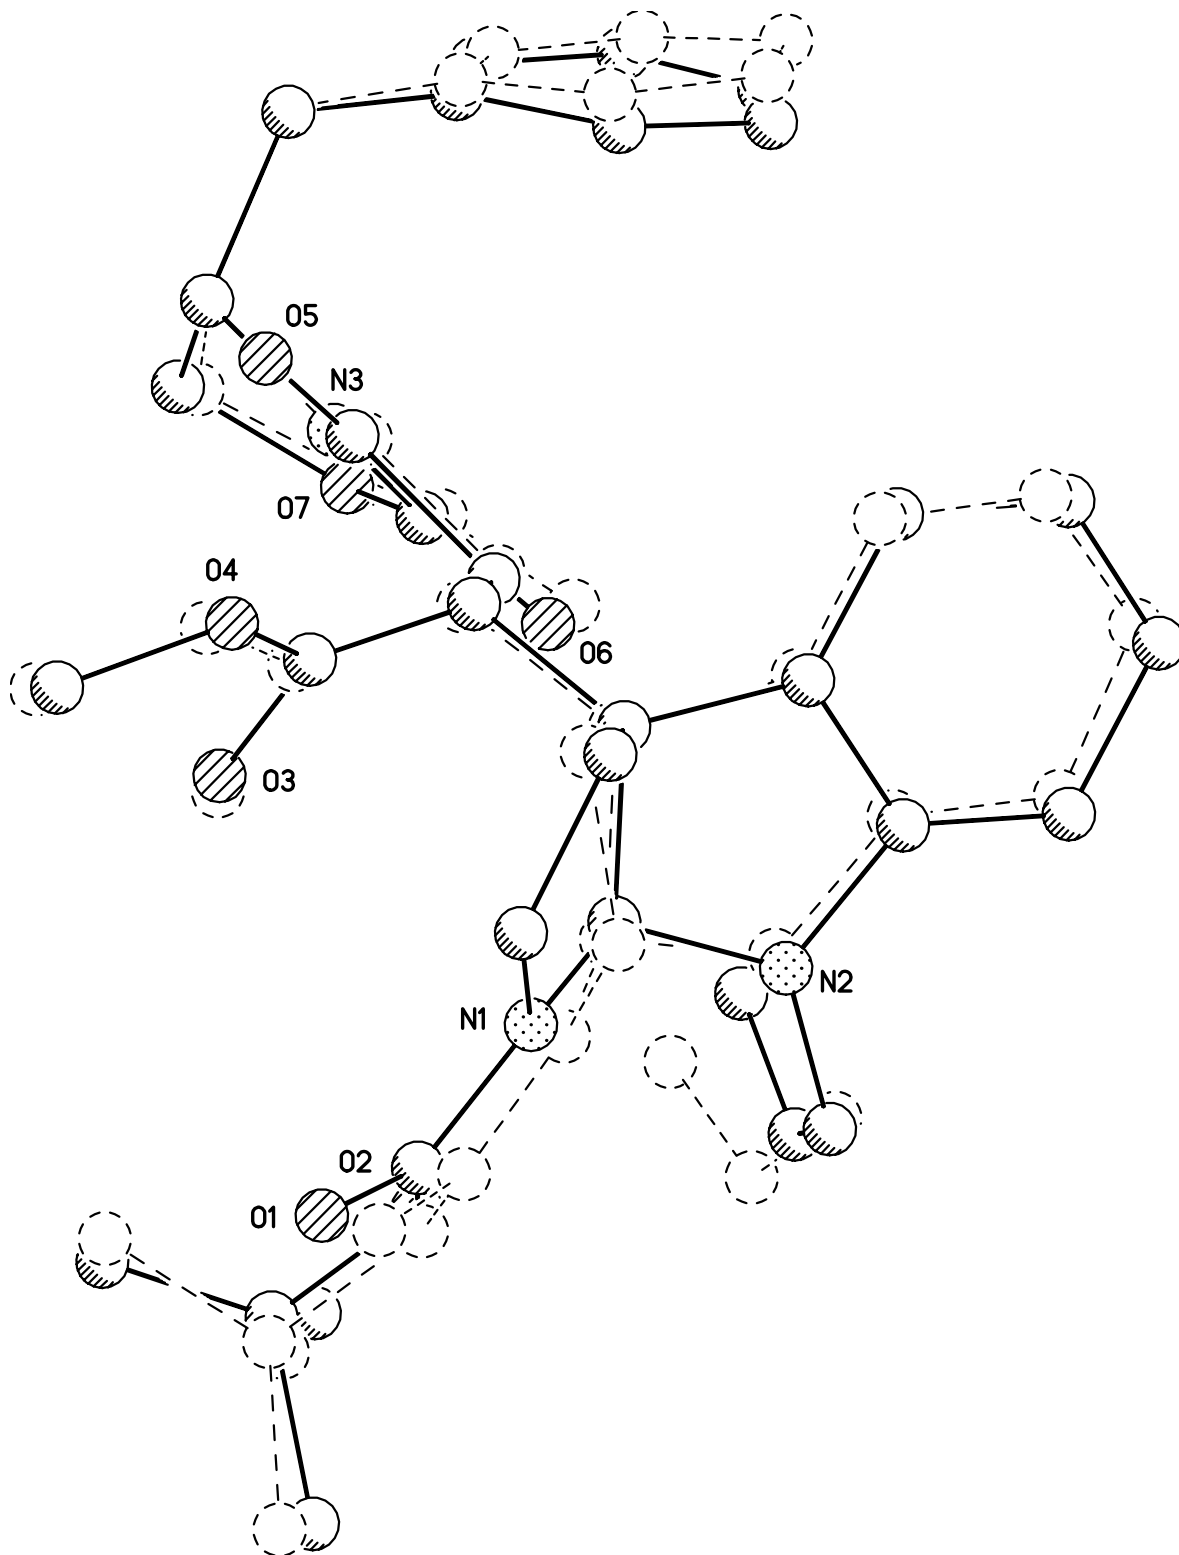

Figure 12. Superposition of molecules A and B of JFA03.

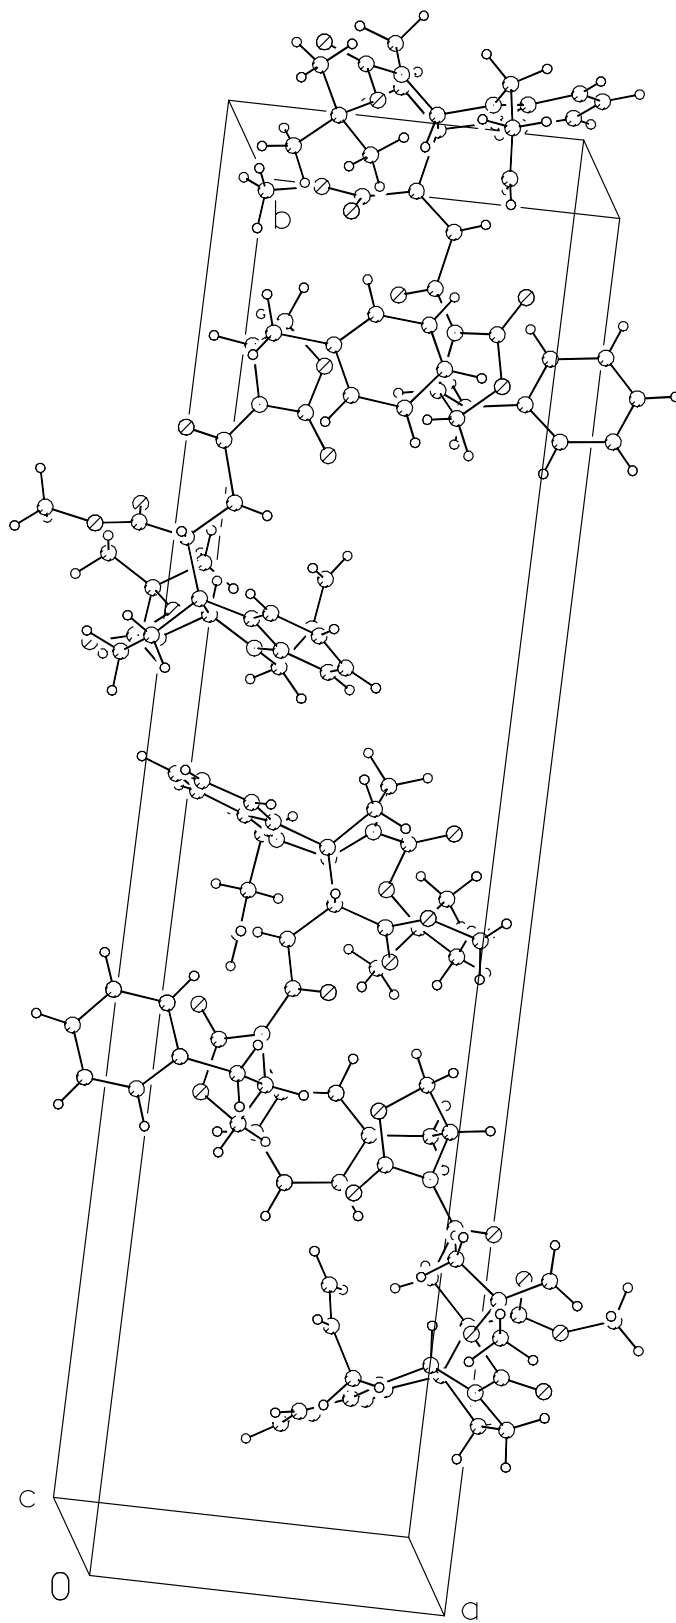

**Figure 13. Unit cell contents of JFA03.**

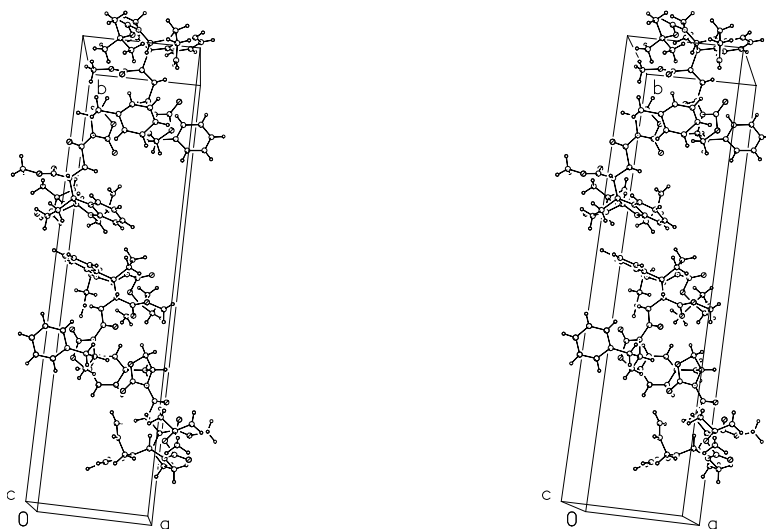

**Figure 14. Stereo view of unit cell contents of JFA03.**
